# Supplementary material for: Leveraging a gene signature associated with disulfidptosis identified by machine learning to forecast clinical outcomes, immunological heterogeneities, and potential therapeutic targets within lower-grade glioma
Source: Front Immunol. 2023 Dec 15;14:1294459. doi: 10.3389/fimmu.2023.1294459 (PMC10757341; doi:10.3389/fimmu.2023.1294459)
Supplement: Supplementary file 3 [file Table_2.xlsx]

## Sheet: Supplementary table 2
gene	conMean	treatMean	logFC	pValue	fdr
RAB4B	5.1752	2.76697	-2.40822	2.94442e-229	3.38357e-228
CALB2	4.21569	2.05354	-2.16215	2.73179e-113	5.84704e-113
AF111169.1	2.86542	0	-2.86542	1.37693e-245	2.19718e-243
SCFD2	1.78116	3.62752	1.84636	9.31363e-238	5.71397e-236
MYOM2	3.37355	1.75178	-1.62177	3.29574e-205	1.69694e-204
ZMAT3	2.42546	4.08757	1.6621	3.88218e-224	3.33904e-223
HLA-DRB1	3.36489	6.46175	3.09686	2.85525e-167	9.15885e-167
UPP1	4.4833	2.16359	-2.31971	2.63494e-211	1.5472e-210
STPG1	2.52191	0.801603	-1.7203	1.00157e-212	6.08132e-212
MIR4292	0.000124845	2.914	2.91388	0	0
AC112907.2	0.484648	2.11257	1.62792	1.95088e-222	1.56751e-221
SNORD99	0.000124845	1.9479	1.94777	0	0
AL031710.1	2.35827	0.55536	-1.80291	4.52834e-177	1.60169e-176
RPRM	1.76427	4.18457	2.4203	2.82297e-157	8.24942e-157
TNNT1	3.23352	1.36772	-1.86581	2.42937e-128	5.74153e-128
CAMK1	4.69346	2.72385	-1.96961	7.93452e-205	4.05783e-204
WFDC1	2.82741	0.838713	-1.98869	4.73559e-205	2.43004e-204
AC138430.2	3.31432	0	-3.31432	1.87271e-244	2.43331e-242
HEY2	1.86274	3.72852	1.86578	4.43012e-189	1.79564e-188
CYP2E1	2.4843	0.728249	-1.75605	5.60317e-218	3.87262e-217
RPL41	9.45548	7.78015	-1.67533	3.80942e-233	7.01388e-232
MZT2A	5.70154	3.14939	-2.55215	3.56925e-227	3.53715e-226
OGDHL	4.21919	1.91449	-2.3047	7.20238e-167	2.30099e-166
AC136632.1	3.53653	1.75512	-1.78141	1.5474e-166	4.92973e-166
ZFYVE28	3.54682	1.6577	-1.88911	9.29835e-210	5.28252e-209
VPS18	2.52928	4.13557	1.60629	5.60021e-237	2.62561e-235
UQCRB	7.38104	4.88749	-2.49355	2.48397e-233	4.81726e-232
PRRT1	5.32318	3.20503	-2.11815	2.26526e-189	9.22277e-189
NPIPB14P	2.23031	0.224848	-2.00547	2.86385e-232	4.52617e-231
MRPL22	3.9049	2.04533	-1.85956	2.2024e-233	4.36902e-232
NCAN	3.73191	7.05977	3.32786	3.90261e-204	1.97092e-203
NLGN3	3.7237	5.98844	2.26474	7.51513e-225	6.6817e-224
CAPN3	5.00243	1.4412	-3.56123	1.05783e-225	9.76798e-225
CHORDC1	3.67123	1.93064	-1.74059	8.7282e-229	9.69321e-228
AC245033.3	2.69109	0.779679	-1.91141	4.33412e-178	1.54835e-177
MYH7	1.16617	2.82565	1.65948	1.91566e-153	5.42715e-153
AKR1C2	2.2459	0.477305	-1.76859	1.20727e-209	6.8288e-209
AL352979.2	1.73372	0	-1.73372	7.00073e-236	2.51184e-234
ABCA1	1.41676	3.77112	2.35436	5.1713e-213	3.15781e-212
MIR1249	0.0738697	1.75503	1.68116	1.43955e-301	4.29292e-299
CREM	4.23112	2.54017	-1.69095	1.17711e-214	7.45574e-214
CSPG4	1.97353	4.16884	2.19531	4.16975e-180	1.52221e-179
DDX21	2.24949	4.02232	1.77283	1.17378e-227	1.19688e-226
LINC01145	2.5285	0.388302	-2.1402	2.30599e-233	4.53495e-232
CCDC167	3.45891	5.59327	2.13437	2.60385e-232	4.13321e-231
WIF1	3.2431	1.19583	-2.04727	2.03868e-96	3.96342e-96
TMEM30A	4.82277	6.43598	1.61321	1.70764e-228	1.85482e-227
DDR1	5.10183	7.56966	2.46783	1.52734e-218	1.07398e-217
SPI1	2.15974	3.86031	1.70057	9.24127e-137	2.30696e-136
SLPI	1.06272	2.65211	1.58939	3.24362e-142	8.43287e-142
HAUS7	4.25203	0.960692	-3.29134	7.96186e-231	1.03898e-229
TIMP4	2.31932	5.9171	3.59778	2.67383e-204	1.35373e-203
FP236383.3	10.5313	0.0181765	-10.5132	1.08478e-243	1.3424e-241
WDR90	3.25862	1.66958	-1.58903	1.82254e-204	9.25052e-204
ANXA3	2.57752	0.693885	-1.88364	1.46778e-204	7.46657e-204
NPIPB3	5.37956	0.380404	-4.99916	1.68959e-233	3.85005e-232
RPL38	8.87368	6.4268	-2.44688	5.9451e-232	8.98233e-231
TBC1D3B	1.6827	0.0299008	-1.6528	1.47685e-229	1.73549e-228
PRRT2	5.58319	3.7205	-1.86269	7.70074e-120	1.71967e-119
RPS10-NUDT3	2.75464	0.429659	-2.32498	1.06894e-203	5.35529e-203
FAHD2B	4.28573	1.93875	-2.34699	1.15838e-223	9.71509e-223
BDH1	4.45417	1.60817	-2.846	4.90239e-231	6.54308e-230
LRIG1	4.28095	7.12342	2.84247	4.65506e-217	3.13398e-216
NOTCH2	2.07313	3.86913	1.796	5.17627e-189	2.09761e-188
DPYSL3	4.26513	7.67359	3.40846	3.64475e-232	5.67652e-231
MICOS10	6.25525	2.54956	-3.70569	1.81215e-233	3.85005e-232
RPL23AP82	3.71437	2.05744	-1.65693	4.65386e-230	5.68941e-229
MZT2B	6.88755	5.27279	-1.61476	3.57932e-214	2.2429e-213
MCL1	4.56592	6.3898	1.82388	6.53849e-205	3.34764e-204
VCAM1	1.02888	2.85474	1.82586	5.94485e-119	1.31994e-118
SORBS2	3.3486	1.44939	-1.89921	9.78805e-209	5.41693e-208
LINC00982	3.27304	1.23101	-2.04203	1.43508e-96	2.79233e-96
PSKH1	2.50908	4.12463	1.61555	3.01233e-230	3.74554e-229
CFB	2.48686	0.379495	-2.10737	1.14781e-229	1.35936e-228
TNPO3	2.906	4.60559	1.69959	3.82443e-238	2.73898e-236
NDUFA3	7.13587	4.4622	-2.67367	4.80013e-230	5.8525e-229
AC004057.1	7.03747	0.103132	-6.93434	2.26407e-235	7.38095e-234
RPS24	9.31893	7.62185	-1.69708	1.61966e-231	2.29644e-230
AC124312.2	1.14643	2.96324	1.81681	1.95644e-147	5.28819e-147
DCAF7	3.32819	5.45951	2.13132	5.84734e-238	3.8963e-236
AC015813.2	2.85148	0.0443869	-2.80709	4.83127e-236	1.79725e-234
NKAIN3-IT1	2.29473	4.378	2.08327	5.09205e-143	1.3328e-142
CMTM3	2.17905	4.33664	2.15759	9.38148e-215	5.96499e-214
NOMO3	3.4154	0.800847	-2.61456	3.22833e-232	5.07138e-231
CRIP1	3.03413	0.309225	-2.72491	1.77543e-229	2.07164e-228
POLR1D	4.8351	2.71971	-2.11538	1.80057e-233	3.85005e-232
PTS	4.29552	2.66836	-1.62716	2.86373e-232	4.52617e-231
PBK	0.0968547	1.94284	1.84599	5.75495e-209	3.20246e-208
NUTM2A-AS1	3.10384	1.51366	-1.59019	4.01919e-223	3.30978e-222
ZNF23	2.95542	0.52458	-2.43084	1.80066e-233	3.85005e-232
LY86	1.44172	3.72906	2.28734	1.69229e-177	6.01259e-177
AC015688.6	3.1958	0	-3.1958	1.37694e-245	2.19718e-243
SPNS1	3.42123	1.00696	-2.41427	4.51154e-232	6.91986e-231
HLA-DRB6	0.457481	2.64106	2.18357	1.48083e-177	5.26437e-177
CORO1C	3.77726	5.69138	1.91411	8.48111e-231	1.10437e-229
RNA5SP216	4.46159	0	-4.46159	6.87819e-191	2.856e-190
ZBTB33	1.96475	3.65289	1.68814	6.69116e-237	3.0506e-235
TP53INP1	1.33757	3.07835	1.74078	7.14363e-226	6.68123e-225
BMP7	3.18775	5.11299	1.92525	1.35638e-198	6.28796e-198
ACAP1	2.69487	0.99248	-1.70239	3.28919e-219	2.35937e-218
SRXN1	3.38946	0.73911	-2.65035	2.22594e-233	4.39654e-232
RBM4	5.09391	2.47943	-2.61448	1.80056e-233	3.85005e-232
AL355574.1	0.169993	2.36873	2.19874	1.1209e-252	2.83199e-250
VIPR1	2.82631	0.845258	-1.98105	2.67336e-163	8.24537e-163
P2RY12	1.84105	4.82707	2.98603	3.653e-179	1.31744e-178
SPTSSA	2.96832	4.63115	1.66282	6.02397e-229	6.78947e-228
RASSF2	4.45341	6.81406	2.36065	3.49798e-167	1.12107e-166
SALL1	2.38554	4.44377	2.05824	8.41643e-194	3.63752e-193
FAM95B1	2.17346	0.0424089	-2.13105	1.23811e-236	5.26292e-235
NMRK1	3.68209	2.09503	-1.58706	4.6801e-224	4.01016e-223
LINC01001	2.75703	0.199704	-2.55733	1.13342e-233	2.79e-232
GANAB	4.76453	6.44017	1.67564	2.7242e-238	2.14557e-236
LGALS8	3.69588	1.85155	-1.84433	1.14143e-233	2.80591e-232
ZCCHC12	3.59828	1.80426	-1.79402	8.42335e-101	1.67738e-100
CAMKK1	3.99297	2.28319	-1.70978	3.76201e-109	7.85162e-109
C1QTNF4	4.0621	2.10673	-1.95537	1.11155e-146	2.98982e-146
NDUFA9	4.36852	2.61113	-1.75739	2.92002e-228	3.12092e-227
RRP9	2.58963	4.31605	1.72642	1.99355e-237	1.06975e-235
WSCD2	3.0437	1.30293	-1.74077	1.061e-96	2.06557e-96
BCL11A	3.15173	0.887643	-2.26409	5.05553e-137	1.26482e-136
BPTFP1	2.17599	0.00213016	-2.17386	2.18914e-214	1.37747e-213
RNU6-322P	0.000124845	1.63583	1.6357	0	0
AC004967.1	0.24713	2.68977	2.44264	1.47308e-239	1.41036e-237
HGS	5.57206	3.98412	-1.58793	1.91207e-232	3.10004e-231
SDR39U1	5.33337	3.08024	-2.25312	7.23091e-232	1.0729e-230
TJP2	3.59262	5.39595	1.80333	1.02339e-148	2.79696e-148
SLC7A1	2.67572	4.6498	1.97408	1.43439e-224	1.25932e-223
ODF2L	3.19612	1.23094	-1.96517	5.87578e-232	8.88498e-231
PDIA4	3.07623	5.2932	2.21697	1.03411e-220	7.79912e-220
PPFIA3	4.65042	2.87737	-1.77304	1.67924e-177	5.9674e-177
TCF7L1	1.86429	3.61853	1.75424	2.27205e-209	1.2788e-208
EGFL8	3.77037	1.36243	-2.40794	1.78571e-232	2.91596e-231
MIR4740	0.000124845	2.03977	2.03964	0	0
AC011462.2	2.94854	0.00439809	-2.94414	7.61778e-239	7.07015e-237
CBWD3	3.37037	0.143758	-3.22661	1.48792e-233	3.5708e-232
DNLZ	3.18097	0.273389	-2.90758	4.73967e-232	7.25142e-231
FCGBP	0.662817	2.59613	1.93331	3.48225e-151	9.68736e-151
LUZP2	1.88887	3.99815	2.10929	3.27863e-143	8.59141e-143
MIDN	3.54503	5.5989	2.05387	2.94403e-216	1.93758e-215
RPL14	7.71763	5.69789	-2.01974	1.37622e-232	2.2842e-231
GADD45G	3.25588	5.57195	2.31606	1.53085e-164	4.77663e-164
MEG8	2.08406	0.260348	-1.82371	2.43511e-223	2.0227e-222
MMP15	1.69671	3.53072	1.83401	9.5739e-218	6.5646e-217
MID1IP1-AS1	0.339006	2.20069	1.86168	2.33698e-224	2.03504e-223
CSPG5	4.66474	6.45011	1.78537	1.8546e-127	4.35486e-127
BSCL2	7.06628	2.11195	-4.95433	1.92108e-233	3.97117e-232
PCBP1-AS1	3.64095	1.12662	-2.51433	1.80071e-233	3.85005e-232
HLA-H	1.6371	3.95861	2.32151	3.27903e-213	2.01108e-212
SNX15	3.4995	0.434928	-3.06458	1.14907e-232	1.95169e-231
ITPR1	3.77205	1.85317	-1.91888	3.10425e-139	7.88789e-139
TRMT5	1.36298	3.11527	1.75229	6.23533e-238	4.0801e-236
AC113935.1	2.90224	4.94058	2.03835	1.60251e-219	1.16326e-218
SNX7	2.09186	3.7817	1.68984	8.32743e-201	3.98014e-200
TNPO1	2.35784	3.98361	1.62577	1.36688e-233	3.30665e-232
SLC35F6	2.55326	4.25312	1.69986	7.42606e-238	4.70688e-236
FIBIN	2.42721	5.21302	2.78581	2.06694e-177	7.33651e-177
RAP1GAP	5.5361	3.93396	-1.60214	6.58641e-122	1.48947e-121
RPL23AP42	7.63493	2.4147	-5.22023	1.79157e-233	3.85005e-232
TNFRSF14	3.41284	1.74696	-1.66589	1.05444e-192	4.48582e-192
WASH9P	4.03515	1.65876	-2.37638	8.15547e-230	9.77314e-229
AGAP4	3.37065	1.00346	-2.36719	3.75423e-233	6.93331e-232
FAM156A	3.26946	0.148156	-3.1213	1.39625e-233	3.36175e-232
ANO6	1.68673	3.37974	1.693	1.27196e-203	6.36715e-203
FABP5	5.3495	1.83842	-3.51108	4.64185e-208	2.52965e-207
ALS2CL	2.394	0.593238	-1.80077	1.01057e-213	6.26347e-213
TMSB15A	0.53652	2.66184	2.12533	5.85921e-183	2.21039e-182
PRMT8	2.45763	0.865541	-1.59209	3.55125e-121	7.99514e-121
ISY1-RAB43	1.61331	0.00957278	-1.60374	1.5653e-232	2.57686e-231
HSPA5	5.0354	7.07103	2.03563	1.23238e-215	8.00649e-215
SKP1	7.96999	5.31353	-2.65646	1.7912e-233	3.85005e-232
TRIM7	1.9825	0.397041	-1.58546	2.10413e-205	1.08708e-204
HHATL	5.57099	3.34362	-2.22737	6.87109e-133	1.67169e-132
PTPRZ1	5.1207	8.09273	2.97203	6.05694e-219	4.30566e-218
C21orf62	0.330712	1.92256	1.59185	1.58308e-176	5.57235e-176
AC012617.1	2.61686	0.324293	-2.29256	7.51178e-233	1.30638e-231
AC074143.2	1.67933	0.0005724	-1.67876	1.52943e-241	1.61755e-239
BEGAIN	3.95522	1.24608	-2.70914	7.82094e-208	4.24688e-207
MLC1	5.63178	7.50556	1.87378	1.09243e-135	2.70703e-135
AL162151.2	4.543	1.94246	-2.60054	1.41248e-61	2.24327e-61
SULT1A4	1.59044	0.0013752	-1.58906	1.28235e-240	1.28879e-238
PPIF	4.06421	5.91047	1.84626	6.95063e-215	4.4349e-214
EIF4A1	6.08254	1.42125	-4.66129	1.79986e-233	3.85005e-232
DOCK9	4.53036	2.59371	-1.93665	6.38504e-225	5.69364e-224
CCDC71L	0.946929	2.85431	1.90738	1.36861e-222	1.10749e-221
S1PR2	0.577942	2.24748	1.66954	5.9553e-234	1.53013e-232
AC007009.1	1.63437	3.28253e-05	-1.63434	2.16093e-241	2.25916e-239
DOC2A	4.26841	1.55356	-2.71486	4.70664e-164	1.46382e-163
AL355974.2	0.937468	2.81402	1.87656	1.02341e-145	2.72974e-145
SOX2	4.29958	8.17836	3.87877	7.83983e-232	1.15947e-230
UNC13C	3.15451	0.73883	-2.41568	2.0887e-171	6.96017e-171
AC083798.2	2.49949	0.781395	-1.71809	5.30612e-233	9.53791e-232
POLR2J3	4.79311	0.50773	-4.28538	1.80067e-233	3.85005e-232
LINC02381	0.775982	2.68303	1.90705	1.05839e-172	3.58066e-172
HERC2P3	4.99546	1.48331	-3.51216	1.28971e-227	1.30775e-226
SF3B5	5.25706	6.98188	1.72482	5.93686e-237	2.768e-235
ERVK3-1	4.3269	2.24826	-2.07864	1.03925e-231	1.51015e-230
HMGN2P15	1.14216	3.28621	2.14405	7.75732e-207	4.14065e-206
TSSK5P	0.135797	1.8	1.6642	1.37285e-232	2.28068e-231
RHOF	1.97521	0.245928	-1.72929	8.57452e-233	1.4841e-231
AC060780.3	0.000124845	1.97989	1.97976	0	0
RPL37	8.3198	6.27181	-2.04799	7.95952e-231	1.03898e-229
AFG3L1P	3.38805	1.5439	-1.84414	6.81223e-232	1.01575e-230
RHOU	3.26506	5.1228	1.85774	1.58831e-155	4.57529e-155
TOGARAM2	2.49347	0.497421	-1.99605	3.01293e-220	2.23707e-219
DBNDD2	7.02381	3.17972	-3.84409	8.62187e-230	1.03049e-228
ZNF638	5.73238	3.78198	-1.95041	3.3404e-233	6.23233e-232
AL035252.4	4.51329	0.314288	-4.199	7.39605e-198	3.3864e-197
AC010503.2	3.2188	0	-3.2188	8.00882e-242	8.67194e-240
TOP2A	0.191592	2.45948	2.26789	1.4425e-198	6.68546e-198
GPR75	1.3631	3.35011	1.987	1.102e-197	5.02794e-197
HAPLN2	5.40961	3.74203	-1.66758	1.14875e-79	2.02646e-79
AC068987.2	1.74976	0	-1.74976	1.25358e-205	6.51911e-205
RPPH1	3.0373	0	-3.0373	7.85257e-245	1.12477e-242
SDC3	4.93795	7.42039	2.48244	1.78062e-225	1.62934e-224
RMRP	1.62917	0.0214556	-1.60771	2.79386e-234	7.6541e-233
LINC00632	3.39053	1.27896	-2.11156	1.46042e-223	1.22201e-222
CCDC92	5.47962	3.5418	-1.93782	1.06144e-228	1.16951e-227
PPIA	9.11287	6.34006	-2.77281	1.78984e-233	3.85005e-232
HNRNPAB	4.22505	5.89167	1.66662	3.92326e-233	7.20161e-232
AC233968.1	2.2939	0.027128	-2.26677	2.43663e-222	1.94748e-221
NEURL1	4.11231	1.89212	-2.22019	1.40722e-144	3.72453e-144
RPH3A	4.42691	2.54166	-1.88525	1.56879e-95	3.03626e-95
PLA2G4C	4.75874	2.7549	-2.00384	1.31554e-235	4.48986e-234
NR2C1	4.02397	2.35321	-1.67076	1.48039e-231	2.11335e-230
NFATC4	3.71868	1.63373	-2.08494	5.5199e-217	3.70937e-216
ALYREF	3.78097	5.46445	1.68348	1.05971e-233	2.62299e-232
SOCS6	1.72891	3.36036	1.63145	8.32835e-222	6.49383e-221
SLC6A15	2.54928	0.909084	-1.64019	1.39243e-157	4.0828e-157
PMS2P6	2.62726	0.201697	-2.42557	4.75816e-234	1.24541e-232
SULT1A3	3.95709	0.0122194	-3.94487	1.10015e-237	6.54014e-236
MICAL3	3.68391	2.02706	-1.65685	3.57691e-219	2.56171e-218
GTF2IP4	5.69545	2.98774	-2.7077	3.25885e-233	6.10522e-232
APOBEC3C	0.869794	2.50807	1.63827	5.70491e-197	2.58219e-196
SYNPO	4.70659	2.95457	-1.75201	4.08195e-94	7.83194e-94
ALDH1B1	1.33619	3.46402	2.12784	1.26063e-236	5.33305e-235
ERCC5	4.15668	2.42264	-1.73404	1.25498e-232	2.10022e-231
ADCYAP1R1	4.20883	7.32073	3.1119	1.96736e-207	1.06196e-206
REX1BD	5.51045	3.43376	-2.07669	1.62868e-222	1.31443e-221
AC008655.1	1.77049	0	-1.77049	1.10538e-209	6.26416e-209
MIR3682	0.000124845	6.44861	6.44848	0	0
EGLN2	5.15873	2.06144	-3.0973	1.87833e-233	3.90054e-232
ATP5PO	6.74684	4.84163	-1.90521	7.67116e-232	1.13637e-230
MATR3	4.86397	0.680503	-4.18346	1.80043e-233	3.85005e-232
PDXP	5.95507	1.46274	-4.49233	3.24132e-233	6.07864e-232
AL669831.5	2.01818	0.208633	-1.80955	1.1988e-232	2.01546e-231
HMGB1P10	0.0625274	2.40905	2.34653	1.9769e-257	5.28849e-255
DAD1	5.95441	7.83636	1.88196	9.8877e-235	2.90577e-233
ZACN	4.12332	0.258727	-3.86459	1.3632e-236	5.71381e-235
CCDC71	1.75603	3.83016	2.07413	2.42185e-238	2.00792e-236
PCLO	2.46938	0.841521	-1.62785	5.8032e-149	1.58746e-148
RGS11	5.27073	3.45762	-1.81311	3.70635e-160	1.10928e-159
AC093620.1	0.35526	1.97707	1.62181	4.13759e-228	4.3709e-227
GRN	4.18507	5.84971	1.66464	4.17348e-220	3.08868e-219
EBI3	0.844563	2.62651	1.78195	3.371e-187	1.33949e-186
DCAF12	2.2885	4.37033	2.08183	2.62906e-238	2.10684e-236
MIR4477B	0.000124845	3.95284	3.95271	0	0
ZHX2	2.59363	4.85494	2.2613	6.13223e-233	1.08619e-231
2023-09-05	6.95372	4.57452	-2.3792	5.26703e-155	1.51148e-154
TBCAP1	0.193014	2.303	2.10998	6.01783e-248	1.42169e-245
EML2	4.85416	2.54284	-2.31132	6.00088e-232	9.05908e-231
USP34	4.60929	2.94393	-1.66536	1.83666e-232	2.99379e-231
GABARAP	8.03963	5.93764	-2.10199	1.818e-233	3.85005e-232
AL391069.2	1.09674	2.7989	1.70216	8.6338e-220	6.32786e-219
AL117190.1	1.8707	0.227076	-1.64362	4.94963e-222	3.90624e-221
AC011330.2	1.91026	0.324938	-1.58532	4.18976e-232	6.46451e-231
OGFRL1	3.49957	5.18293	1.68336	3.8948e-169	1.26949e-168
CALM2	9.00704	7.18846	-1.81858	3.89301e-229	4.43998e-228
RNU7-123P	0.000124845	1.84929	1.84917	0	0
RPL13	9.37635	7.38793	-1.98842	1.37398e-229	1.62089e-228
TTLL3	4.31614	2.01001	-2.30613	7.86196e-236	2.78785e-234
SDE2	1.77159	3.47345	1.70186	2.81774e-234	7.70791e-233
WDR19	4.18388	2.59298	-1.5909	2.20023e-224	1.91963e-223
TRIM73	1.8037	0.0773145	-1.72639	9.9311e-235	2.90912e-233
COL16A1	4.87013	3.21501	-1.65512	6.36098e-146	1.70068e-145
RPS15A	7.8037	5.6446	-2.1591	5.96498e-230	7.22911e-229
AC022149.1	1.92404	0.330112	-1.59393	1.28838e-164	4.0235e-164
PNMT	2.97039	1.09332	-1.87707	4.79034e-140	1.22458e-139
AL391807.1	5.05749	3.13832	-1.91917	1.98423e-210	1.14225e-209
NME2	6.76206	3.99036	-2.7717	9.34296e-233	1.60489e-231
MUC20-OT1	4.58974	1.16758	-3.42217	1.81349e-233	3.85005e-232
NFIX	5.19529	7.20416	2.00887	3.27687e-214	2.05409e-213
DMTN	6.12329	3.75693	-2.36636	1.18337e-140	3.03578e-140
AL160408.2	2.0677	0	-2.0677	2.37971e-197	1.08007e-196
GAPDHP1	0.771033	2.43669	1.66565	2.66887e-179	9.64621e-179
AC055720.2	0.0730812	3.33222	3.25914	0	0
LPCAT4	5.69695	3.02435	-2.67261	3.42106e-208	1.87053e-207
GID8	3.17472	4.84555	1.67082	2.69546e-238	2.14118e-236
C12orf76	5.04687	3.34757	-1.6993	1.76905e-229	2.06552e-228
KIAA1211	1.16992	2.92007	1.75015	1.37873e-200	6.56215e-200
PRMT7	4.60468	2.75112	-1.85356	6.73021e-227	6.60352e-226
CORO6	4.40931	1.56961	-2.8397	1.36339e-193	5.86322e-193
GTF2IP1	5.7075	0.511747	-5.19576	1.80009e-233	3.85005e-232
AAR2	2.6687	4.36807	1.69937	5.34839e-238	3.63032e-236
YBX1P10	0.356652	1.99581	1.63915	1.84192e-235	6.1367e-234
VAT1	4.18913	6.02725	1.83811	1.43411e-195	6.33508e-195
GLIS2	2.32554	3.9179	1.59236	7.22145e-210	4.11288e-209
TMEM161B-AS1	4.35682	2.68744	-1.66938	4.44805e-228	4.68526e-227
SCG3	4.87464	7.88632	3.01168	4.7825e-195	2.09584e-194
YJU2	3.27321	4.88667	1.61346	2.13163e-235	6.97418e-234
POLR2F	5.26791	1.34825	-3.91966	1.76276e-233	3.85005e-232
MRPL38	5.10194	2.09962	-3.00232	9.20038e-233	1.58339e-231
TMEM115	3.21888	4.96219	1.7433	6.46152e-238	4.19791e-236
SCN1B	5.76024	2.94715	-2.81309	6.52573e-197	2.94711e-196
TPX2	0.546824	2.58563	2.0388	3.68418e-226	3.49057e-225
SNHG22	2.18357	0.368619	-1.81495	7.21397e-230	8.67345e-229
DLG2	3.9992	2.40657	-1.59263	1.03537e-164	3.23616e-164
LRP5	1.7301	3.55144	1.82134	1.49444e-222	1.20716e-221
AC010503.1	3.81537	0	-3.81537	7.85252e-245	1.12477e-242
MYC	1.16258	4.54387	3.38129	3.90805e-231	5.29347e-230
SFI1	4.20862	1.59256	-2.61606	1.90266e-232	3.08754e-231
SGCB	3.64193	5.22853	1.5866	3.17794e-234	8.58987e-233
TREX1	3.79161	0	-3.79161	5.75793e-246	9.78922e-244
COX7A1	4.61361	2.90282	-1.7108	3.21391e-132	7.79004e-132
AC135457.1	1.89671	0	-1.89671	4.46193e-244	5.67603e-242
RAP1B	4.44377	1.52922	-2.91455	5.26863e-233	9.48927e-232
AP003108.2	3.23837	0.20143	-3.03694	2.83023e-233	5.39671e-232
DNER	4.93392	7.53514	2.60123	1.21198e-226	1.17147e-225
TPM1	5.54034	3.06842	-2.47192	3.92791e-231	5.31641e-230
GAL3ST4	1.64056	3.61305	1.97249	8.41314e-219	5.96661e-218
GSTM5	4.18912	1.405	-2.78412	1.28865e-186	5.07068e-186
CCNL1	4.688	3.08954	-1.59847	1.17349e-212	7.10879e-212
RNU6-415P	0.000124845	2.03093	2.0308	0	0
AC093535.2	3.05663	4.78928	1.73265	2.64292e-145	7.03399e-145
IMMP1L	4.37389	2.61455	-1.75934	4.10505e-231	5.5438e-230
COA1	4.13533	2.42343	-1.7119	3.78058e-233	6.96784e-232
GPR17	2.75303	5.03555	2.28252	1.0629e-120	2.38619e-120
RNF220	5.72345	3.63502	-2.08843	1.3512e-232	2.24717e-231
NGRN	6.42937	4.14287	-2.2865	1.86341e-233	3.88712e-232
AC159540.2	3.72414	0.00427792	-3.71986	9.94113e-237	4.37867e-235
L3MBTL1	3.33267	1.44601	-1.88666	9.17577e-227	8.92124e-226
JAM2	3.08831	5.26213	2.17382	7.43126e-228	7.67208e-227
TTR	2.07419	0.0843519	-1.98984	6.19403e-197	2.79939e-196
PSAP	8.38016	10.0241	1.64395	3.5252e-232	5.50506e-231
TXNL4A	5.66069	3.86108	-1.79961	8.95331e-228	9.20687e-227
BYSL	1.95208	3.57233	1.62024	1.3962e-233	3.36175e-232
SOWAHA	4.20902	2.09541	-2.11361	4.82416e-129	1.14654e-128
ANKIB1	3.09239	4.71762	1.62523	5.99891e-218	4.14456e-217
CKMT1A	3.96913	1.04265	-2.92647	6.8658e-195	2.9987e-194
FCHSD2	3.43467	5.2778	1.84312	2.45458e-212	1.47412e-211
WDR5B	0.837079	2.43652	1.59944	3.7468e-235	1.1711e-233
AP3B2	5.18088	3.02685	-2.15403	1.2759e-189	5.21219e-189
SNAP25	8.42691	6.01027	-2.41664	2.51593e-84	4.56578e-84
ACLY	3.6807	5.6877	2.007	4.15861e-234	1.10598e-232
AC138207.5	0.220789	2.01642	1.79563	1.84243e-238	1.63491e-236
AC244517.7	0.29265	2.42932	2.13667	2.06304e-231	2.87797e-230
RPL39P3	5.56378	3.9246	-1.63918	2.30368e-134	5.65918e-134
CBWD1	3.28057	0.648586	-2.63198	1.80071e-233	3.85005e-232
ZDHHC11	3.20944	0.982701	-2.22674	2.5731e-225	2.33686e-224
CCDC180	2.46474	0.349594	-2.11514	1.83285e-233	3.85005e-232
CANX	5.97409	7.74838	1.77429	6.62263e-224	5.62166e-223
AL157392.3	3.49089	1.50448	-1.98641	2.30205e-231	3.19915e-230
AC010624.2	2.88546	0.894379	-1.99108	6.26344e-210	3.57397e-209
LAPTM4A	5.1411	7.31114	2.17004	1.21217e-235	4.17703e-234
PPP1R13B	3.75455	2.0854	-1.66915	5.37964e-214	3.3537e-213
STAG3L1	2.05587	0.286249	-1.76962	2.20697e-231	3.07169e-230
TGFBR1	1.78732	3.49342	1.7061	1.67012e-215	1.08156e-214
MS4A7	1.24347	2.89708	1.65361	7.45195e-142	1.93158e-141
TTC4	3.23802	1.11511	-2.1229	1.83273e-233	3.85005e-232
HSD17B10	4.37493	6.34615	1.97121	8.7098e-235	2.57626e-233
HPS6	1.64741	3.29137	1.64396	8.73824e-237	3.90559e-235
AL353813.1	3.79449	0	-3.79449	1.87267e-244	2.43331e-242
ABCA5	3.45354	0.786806	-2.66674	4.60522e-230	5.63373e-229
PARP4	1.67631	3.37247	1.69617	2.35634e-216	1.55361e-215
PSMA2	4.73615	2.25339	-2.48276	1.88528e-233	3.9105e-232
MMP2	1.25391	3.68884	2.43493	7.77199e-223	6.34276e-222
SLCO4A1	3.35087	1.63955	-1.71132	4.8949e-158	1.43943e-157
CES4A	4.84802	1.03035	-3.81767	3.59796e-231	4.89167e-230
P2RY13	0.844524	2.73109	1.88656	7.6785e-187	3.03519e-186
AL354740.1	5.32675	0.102339	-5.22441	4.45512e-234	1.17114e-232
MIR3151	0.000124845	1.76541	1.76529	0	0
CABP1	5.11973	2.0332	-3.08652	8.36366e-172	2.80244e-171
GARNL3	3.94992	1.81859	-2.13133	5.96421e-228	6.21391e-227
SEC61A1	4.36981	6.42469	2.05488	4.6634e-236	1.74551e-234
AC126755.1	4.04699	0.628421	-3.41857	3.91867e-232	6.08229e-231
METTL7A	4.84085	6.73132	1.89046	2.79833e-183	1.05968e-182
RGPD6	3.04492	0.00251577	-3.04241	9.89344e-238	5.99905e-236
RNF207	2.51854	0.709605	-1.80893	4.06042e-194	1.76074e-193
RP2	1.02041	2.92854	1.90813	4.4319e-233	8.05402e-232
NSUN5P1	3.97846	2.11751	-1.86094	4.30792e-216	2.8301e-215
MIPEPP3	0.395839	2.29634	1.9005	2.52722e-238	2.062e-236
HLA-B	6.25783	7.86103	1.60319	3.34333e-141	8.61696e-141
CSTF2T	2.53401	4.29685	1.76284	8.76926e-237	3.90984e-235
GDF1	3.82252	0	-3.82252	1.37693e-245	2.19718e-243
SFRP2	1.31	4.87134	3.56134	3.02085e-136	7.51329e-136
KREMEN1	2.36658	0	-2.36658	5.75799e-246	9.78922e-244
ABCC8	4.7279	2.65757	-2.07034	6.34102e-141	1.63084e-140
EIF4EBP1	2.16991	4.55342	2.38351	1.09632e-214	6.95124e-214
TCF12	3.30129	5.99523	2.69394	1.32647e-220	9.96277e-220
SRRM3	5.03376	2.42683	-2.60693	1.06336e-161	3.22823e-161
SERF2	7.79313	5.3908	-2.40233	2.2054e-231	3.07169e-230
KCTD5	2.82858	4.62328	1.7947	8.20399e-236	2.90348e-234
ASB3	3.19535	1.55816	-1.63719	4.20001e-231	5.66363e-230
ZFR2	2.75407	1.06251	-1.69157	8.06024e-143	2.10515e-142
DNAJB6	5.68975	2.93447	-2.75528	1.80017e-233	3.85005e-232
MT-TY	0.000124845	3.80623	3.80611	0	0
TSPAN12	1.46746	3.60381	2.13635	1.17353e-212	7.10879e-212
ELOC	5.38978	3.52175	-1.86802	2.74085e-233	5.2483e-232
RNVU1-18	3.58609	0.0473271	-3.53877	3.89854e-226	3.68599e-225
TMED3	3.9765	1.88856	-2.08794	6.63885e-233	1.16458e-231
RGPD5	1.76516	0.00162549	-1.76354	5.76227e-239	5.40317e-237
PLCH2	3.92739	1.60554	-2.32185	3.46853e-200	1.64184e-199
NDUFA11	6.73838	3.68873	-3.04965	4.93513e-230	6.00502e-229
AC138969.1	7.45032	0.348423	-7.10189	1.68629e-233	3.85005e-232
RCC2	3.13469	5.07822	1.94353	6.36593e-237	2.92431e-235
DHTKD1	2.31149	4.18274	1.87125	1.77525e-234	5.01454e-233
AQP4	5.48295	7.82395	2.34099	2.31103e-125	5.3486e-125
HPCA	5.90896	3.39134	-2.51761	8.28531e-88	1.53262e-87
RNU6-850P	0.000124845	1.60298	1.60286	0	0
TXNDC5	2.48766	0.709072	-1.77859	1.62654e-229	1.90893e-228
TIMP2	5.17326	7.2866	2.11334	3.49645e-217	2.36007e-216
TUT4	4.30424	1.97285	-2.33139	3.93041e-233	7.20747e-232
ZNF711	2.4415	4.14097	1.69947	1.19946e-216	7.97783e-216
RNF175	3.06465	1.26453	-1.80012	3.07217e-179	1.10906e-178
SH3BP5	4.06189	1.75197	-2.30991	2.17616e-227	2.18108e-226
BAIAP2	5.11231	3.21556	-1.89675	3.12297e-189	1.26893e-188
LTO1	3.66994	1.83947	-1.83047	1.80066e-233	3.85005e-232
SLC40A1	1.94441	3.57009	1.62568	1.414e-174	4.87623e-174
CNDP1	4.21091	2.54285	-1.66805	1.00298e-68	1.65731e-68
RPL37A	10.0619	6.9391	-3.12276	1.31134e-233	3.19339e-232
MIR4435-2HG	2.34918	0.643129	-1.70605	1.94249e-171	6.47651e-171
DHRS11	3.56046	1.80117	-1.75929	1.51687e-216	1.00633e-215
POLDIP3	4.12477	5.83776	1.71299	1.08216e-235	3.75677e-234
PENK	3.54944	1.01285	-2.53659	2.30203e-109	4.81226e-109
AC098484.1	0.716513	2.34894	1.63243	1.84373e-236	7.48646e-235
GPRC5C	3.70666	1.62108	-2.08557	6.11288e-195	2.67306e-194
RNF144A-AS1	2.23885	0.396116	-1.84274	4.57402e-198	2.10276e-197
SMG1P7	3.19619	1.25461	-1.94158	5.51988e-225	4.93669e-224
WBP1L	2.99588	4.72708	1.7312	1.03835e-237	6.27528e-236
FAM84B	2.22325	4.79389	2.57064	2.95443e-208	1.61685e-207
BCHE	2.24058	5.15908	2.91849	3.86885e-224	3.32915e-223
ZNF337	3.53425	1.4602	-2.07405	1.60645e-232	2.64223e-231
GPR37L1	3.8787	5.64366	1.76497	3.4036e-142	8.84497e-142
EIF4E	3.68253	2.02384	-1.65868	2.40552e-231	3.33274e-230
CBX7	5.17645	3.53815	-1.6383	8.86099e-191	3.67595e-190
CCDC84	4.26293	2.47257	-1.79036	1.73083e-220	1.29198e-219
C1QTNF5	2.82099	0	-2.82099	5.75802e-246	9.78922e-244
AC007192.2	4.63157	0	-4.63157	2.52586e-243	2.92691e-241
RAB7A	6.07883	7.76432	1.68548	1.17809e-236	5.06633e-235
RPE65	0.345111	2.40122	2.05611	3.62977e-183	1.37303e-182
DGKZ	5.99685	3.52527	-2.47158	1.07659e-207	5.83735e-207
HDDC2	6.10508	3.93235	-2.17273	2.54364e-231	3.51339e-230
AC021739.2	0.883379	3.41857	2.53519	9.00374e-218	6.18064e-217
AGAP5	1.78621	0.130746	-1.65547	1.07868e-233	2.66246e-232
S100A13	6.58202	3.42582	-3.15621	3.05831e-215	1.96377e-214
GOLGA8B	4.59396	2.3816	-2.21236	4.64392e-186	1.81711e-185
AC005921.2	2.13001	0	-2.13001	2.53797e-183	9.61839e-183
KCTD12	3.22193	5.02754	1.8056	5.20534e-183	1.96575e-182
MCF2L2	3.0913	1.20679	-1.88451	1.32494e-212	8.01528e-212
STX16-NPEPL1	2.7514	1.15302	-1.59838	2.90588e-157	8.49034e-157
AIFM3	5.13563	1.98153	-3.15409	2.41034e-208	1.32227e-207
WASH2P	3.60203	1.88285	-1.71918	8.78385e-226	8.1524e-225
MTPN	4.89673	6.79461	1.89788	1.18229e-229	1.39929e-228
BICDL1	3.82093	1.10395	-2.71699	4.90948e-206	2.58042e-205
B4GALT5	2.94813	4.92399	1.97586	1.46113e-236	6.04077e-235
RF00002	2.76206	0.00406494	-2.758	2.94254e-242	3.28391e-240
KCNT1	3.66857	0.906928	-2.76164	5.67892e-174	1.94879e-173
RAB40B	5.1162	3.07151	-2.0447	2.91962e-209	1.63569e-208
SLX1B	1.66749	0.02268	-1.64481	1.52142e-216	1.00898e-215
KCNAB2	5.11098	3.16616	-1.94482	1.42518e-129	3.39872e-129
ITPR2	1.56088	3.30773	1.74685	3.00433e-212	1.8019e-211
AL031600.3	2.76103	0	-2.76103	6.00381e-233	1.06448e-231
CENPV	4.73163	2.68594	-2.04569	5.21321e-183	1.96832e-182
DTNB	4.60436	2.23948	-2.36488	1.10571e-230	1.42349e-229
RAB20	1.30874	3.15276	1.84402	1.92143e-185	7.45738e-185
MDFI	1.53261	4.44227	2.90966	1.8892e-184	7.25794e-184
MSANTD3-TMEFF1	3.58224	0.121313	-3.46092	2.61051e-234	7.18424e-233
SNRPGP2	0.97415	2.88301	1.90886	8.00276e-220	5.87245e-219
SYNPR	4.67829	1.78194	-2.89634	2.03555e-150	5.63517e-150
TMSB4XP6	2.83602	0	-2.83602	1.13934e-134	2.80191e-134
MIR25	0.000124845	2.83847	2.83835	0	0
AP006284.1	1.8548	0.175645	-1.67915	7.17271e-210	4.08768e-209
SMC3	2.91524	4.70766	1.79242	8.35798e-230	1.00026e-228
RIPK2	1.70532	3.42352	1.7182	6.51632e-212	3.87888e-211
MGST1	5.44937	3.08917	-2.3602	6.61347e-171	2.18976e-170
AC010132.3	2.30555	0.0088434	-2.2967	5.54977e-238	3.72531e-236
AC005288.1	2.13786	3.99879	1.86093	5.8247e-230	7.06381e-229
DST	6.60059	4.37622	-2.22437	2.71385e-232	4.30406e-231
XPR1	1.88815	3.49856	1.61041	8.23037e-235	2.4544e-233
ACTG1	8.35812	10.2636	1.90549	3.75e-236	1.43916e-234
AC125494.1	2.7681	0.0534624	-2.71464	2.30236e-235	7.49235e-234
AC104072.1	3.62339	1.82508	-1.79831	3.60124e-93	6.8777e-93
ABHD17A	5.89104	3.3854	-2.50564	3.95911e-230	4.86623e-229
UPK3BL1	4.12769	0.437197	-3.69049	2.96589e-235	9.44878e-234
ARID5B	1.63899	3.3089	1.66991	1.18022e-218	8.33442e-218
INO80B	3.82242	2.17221	-1.65021	1.20069e-227	1.22294e-226
AC068831.4	4.23968	0	-4.23968	5.75784e-246	9.78922e-244
RBPMS	2.76564	1.12674	-1.63889	3.96843e-192	1.68e-191
NFIB	2.80202	4.74238	1.94036	2.89438e-221	2.21505e-220
PPIL1	3.51926	5.18677	1.66751	8.70692e-237	3.90117e-235
GPX1	5.86429	7.68566	1.82137	9.50509e-215	6.04147e-214
COX7CP1	2.32985	0.670741	-1.65911	1.82388e-176	6.41126e-176
EPB41L3	5.00439	3.18661	-1.81779	4.66686e-170	1.53267e-169
PNMA1	5.17884	7.15889	1.98005	5.28166e-227	5.20469e-226
RELN	3.17172	1.20771	-1.96401	5.39417e-123	1.22872e-122
COPS9	7.08366	4.89193	-2.19173	1.26314e-221	9.80285e-221
LPL	3.04375	5.70899	2.66524	4.17831e-154	1.18892e-153
ARL17A	2.32536	0.171272	-2.15409	1.36694e-233	3.30665e-232
SYT11	5.71771	8.02779	2.31009	8.58581e-229	9.55257e-228
ZNF280D	3.6868	1.79904	-1.88776	1.81344e-233	3.85005e-232
H1FX	5.16127	6.75532	1.59405	5.1047e-188	2.04717e-187
RPL41P1	0.000124845	7.15165	7.15152	0	0
RBP4	3.51305	1.50922	-2.00383	6.69568e-76	1.15418e-75
ASPSCR1	4.11575	2.31917	-1.79658	7.16559e-227	7.00802e-226
GABRA2	3.12797	1.13091	-1.99706	2.92139e-148	7.95317e-148
NPIPP1	5.10781	2.16099	-2.94683	1.49815e-230	1.91517e-229
AL589880.1	0.0225329	1.86887	1.84634	0	0
PCP4	6.21538	2.4127	-3.80268	3.79482e-189	1.53951e-188
MAVS	2.48431	4.08319	1.59887	2.64671e-235	8.53659e-234
GPR89B	2.61001	0.674635	-1.93537	1.95316e-233	3.99663e-232
RCOR2	1.79975	4.55984	2.76009	1.31505e-185	5.11374e-185
EIF3C	6.82278	1.07608	-5.74669	1.79862e-233	3.85005e-232
FLCN	4.32027	2.71515	-1.60512	1.0685e-213	6.61803e-213
ANKRD37	3.67816	1.69349	-1.98467	2.24329e-230	2.83191e-229
INAFM2	3.1319	5.14936	2.01746	3.7318e-237	1.85987e-235
RNU6-1016P	0.000124845	1.67439	1.67427	0	0
MOBP	6.26889	3.57163	-2.69726	1.0751e-102	2.16269e-102
ZNF706	5.45057	3.83038	-1.62019	2.76036e-233	5.27456e-232
CLIC4	3.94042	6.42233	2.48191	1.31623e-206	6.98879e-206
GCSHP5	4.08739	0.648129	-3.43926	8.18427e-230	9.80119e-229
FP236383.2	10.5313	0.00576676	-10.5256	5.66113e-245	8.23853e-243
GNG3	6.74001	4.07173	-2.66828	6.6011e-118	1.45517e-117
MAGT1	2.40455	4.24507	1.84052	2.42112e-214	1.52239e-213
AC093010.3	4.27833	6.62657	2.34824	2.16858e-215	1.39839e-214
EPHB1	2.38743	4.04971	1.66228	2.28055e-142	5.93327e-142
MTND4P12	0.793824	4.99355	4.19973	8.01488e-196	3.55867e-195
MMP14	1.61442	3.9434	2.32897	1.25514e-202	6.18091e-202
NPIPA8	2.45225	0.00750203	-2.44475	1.25585e-223	1.0518e-222
CYP51A1	3.75872	1.81835	-1.94037	1.97211e-229	2.28938e-228
NPIPA7	2.33218	0.0139407	-2.31823	2.23614e-240	2.21074e-238
EIF4EBP2	3.35226	5.03749	1.68523	2.86147e-235	9.18068e-234
CCDC159	4.5383	2.76854	-1.76976	6.81991e-225	6.07547e-224
CRABP1	3.39717	0.883462	-2.51371	2.81446e-167	9.0312e-167
PTPRN	5.35043	3.19885	-2.15158	5.33858e-126	1.24108e-125
LYRM9	4.32568	2.29156	-2.03412	3.62848e-209	2.0272e-208
GLS2	3.48324	0.243506	-3.23974	1.65215e-228	1.79751e-227
SARS2	3.56649	1.36144	-2.20505	1.72521e-231	2.42911e-230
CHST3	1.81203	3.93472	2.12269	3.09336e-218	2.15682e-217
SMARCA1	3.21051	4.88236	1.67186	9.78731e-234	2.44562e-232
FERMT1	0.925329	3.96031	3.03498	1.64048e-186	6.44955e-186
ECHDC2	5.52234	1.19658	-4.32575	2.9525e-233	5.60051e-232
SAMHD1	2.7643	4.69587	1.93157	9.93623e-220	7.27364e-219
PIK3R2	3.92484	0.592019	-3.33282	6.79302e-233	1.18819e-231
EGR2	0.75799	2.53257	1.77458	7.77448e-146	2.07588e-145
AGPAT5	3.21683	4.98861	1.77179	6.49349e-230	7.8279e-229
GRIN1	5.97912	3.26509	-2.71403	1.97087e-137	4.94716e-137
ST8SIA3	5.12687	2.35246	-2.77441	3.99393e-171	1.32604e-170
KCTD20	3.00517	4.89819	1.89303	1.84323e-237	1.00995e-235
ARMH1	2.8753	1.15603	-1.71927	6.46175e-212	3.84765e-211
RAB10	4.37612	6.37498	1.99886	2.01564e-236	8.11207e-235
COPG2	2.71788	4.38501	1.66713	6.74513e-233	1.18095e-231
TUBA8	3.69135	0.17837	-3.51298	1.36212e-233	3.30378e-232
ARPP21	5.50761	2.89254	-2.61507	3.47704e-151	9.67434e-151
CARMIL2	4.23953	0.989846	-3.24968	1.91817e-219	1.38851e-218
AC024075.1	0.758983	2.56769	1.8087	8.88132e-224	7.49351e-223
HMX1	0.602901	2.41529	1.81239	3.25536e-144	8.59856e-144
PAGR1	4.69779	3.07565	-1.62214	2.27381e-186	8.92211e-186
MAP1LC3A	6.51707	4.24909	-2.26798	1.96538e-211	1.15853e-210
ZDHHC8P1	2.88988	1.00658	-1.88329	3.74279e-171	1.24311e-170
MEG9	2.11718	0.437704	-1.67948	2.49426e-199	1.16791e-198
AC138932.1	3.00731	0.900907	-2.10641	2.17732e-219	1.57111e-218
COCH	2.07731	0.4079	-1.66941	1.77137e-158	5.22847e-158
MAML2	1.37747	4.28907	2.9116	3.94679e-236	1.49887e-234
HSF4	5.13705	2.22872	-2.90833	4.00522e-223	3.29977e-222
CCR1	0.688926	2.37858	1.68965	9.6849e-177	3.4143e-176
CCDC107	4.01839	2.43264	-1.58575	2.76516e-224	2.40215e-223
AFAP1	1.97668	3.6193	1.64262	3.30412e-221	2.52543e-220
AC139256.2	3.65844	0.836924	-2.82151	1.03375e-232	1.76738e-231
LRRC49	3.49701	1.90909	-1.58792	2.86847e-229	3.29838e-228
IL3RA	1.45311	3.34923	1.89612	2.73881e-211	1.60715e-210
ZNF410	3.34138	0.560455	-2.78092	1.80067e-233	3.85005e-232
GUK1	7.72882	5.67555	-2.05327	1.11894e-228	1.22989e-227
CLK1	6.28035	4.4151	-1.86524	5.04876e-213	3.08505e-212
MSI1	1.96176	4.2151	2.25334	3.02671e-233	5.71151e-232
CKMT1B	4.98378	1.25402	-3.72976	7.80275e-214	4.84271e-213
NMB	2.23952	6.77456	4.53504	1.23204e-220	9.25738e-220
MTCO1P40	0.425651	2.28815	1.8625	1.65482e-206	8.77378e-206
OLIG1	6.11713	8.51528	2.39815	3.49e-165	1.09554e-164
AC013391.3	1.01726	2.94073	1.92347	8.23085e-187	3.25141e-186
CCND2	2.78063	5.49656	2.71593	1.87562e-230	2.38097e-229
TOM1L1	2.19246	0.5623	-1.63016	3.56379e-207	1.91292e-206
PSMB10	5.1428	3.4173	-1.7255	1.33209e-181	4.94937e-181
SLC31A2	3.12569	1.24489	-1.8808	6.05384e-173	2.05152e-172
NACA	8.67202	6.10922	-2.5628	1.16375e-237	6.82898e-236
MRPL53	4.56326	2.13175	-2.43151	1.46223e-231	2.08958e-230
AC008105.1	2.26006	0.565775	-1.69429	1.97701e-179	7.15981e-179
PMS2P1	1.68098	3.39159	1.71061	2.58258e-238	2.08799e-236
KCTD11	1.65947	3.35871	1.69925	1.01445e-228	1.11909e-227
MAFB	1.38071	4.36615	2.98543	9.47411e-231	1.22577e-229
AC012615.3	3.17208	0.000185475	-3.1719	1.73875e-243	2.09468e-241
AL132780.3	1.71207	0	-1.71207	1.28212e-236	5.39889e-235
AC113191.1	0.720189	2.581	1.86081	6.88872e-203	3.40246e-202
PDE4DIP	5.75966	3.56333	-2.19633	5.58212e-231	7.40658e-230
RNY3P8	0.51669	2.44647	1.92978	2.85476e-171	9.49724e-171
HCG25	4.18811	0.735436	-3.45267	5.75464e-233	1.02933e-231
AC008894.2	3.06667	0.0165857	-3.05008	1.80066e-237	9.92602e-236
SOX4	1.37398	5.64113	4.26715	7.50609e-235	2.25319e-233
FMC1-LUC7L2	1.79485	0.0556121	-1.73924	1.72827e-129	4.11936e-129
MOK	3.60758	1.26236	-2.34521	3.17923e-237	1.60203e-235
AL355816.2	3.01636	0	-3.01636	1.87266e-244	2.43331e-242
ATP1B2	6.4471	8.50044	2.05335	3.16561e-208	1.7319e-207
VEGFA	4.02005	2.16282	-1.85723	3.97007e-181	1.46609e-180
CBS	4.34345	1.0793	-3.26416	1.72526e-231	2.42911e-230
ARHGEF26	2.5641	4.29746	1.73335	2.04433e-198	9.45786e-198
TSTD1	3.85449	1.7063	-2.14819	1.28589e-144	3.40441e-144
AC091564.4	2.50089	0	-2.50089	1.87268e-244	2.43331e-242
PRCD	3.376	0.829629	-2.54637	1.67307e-225	1.53324e-224
SCARA3	4.02207	6.33274	2.31067	5.75924e-202	2.80725e-201
NDUFB8	7.38329	4.35306	-3.03023	1.87189e-233	3.89182e-232
MTCP1	3.41981	0.43229	-2.98752	2.68422e-233	5.15614e-232
GLRX	4.05484	1.98495	-2.06989	1.09263e-215	7.10366e-215
MIR770	0.000124845	2.63577	2.63565	0	0
RAB26	5.01287	2.07946	-2.93341	7.62278e-196	3.3854e-195
MIR103A2	0.000124845	1.89372	1.89359	0	0
CASK	2.24754	4.09354	1.846	2.69817e-236	1.06239e-234
C11orf98	4.79424	2.9539	-1.84034	5.91193e-228	6.1665e-227
AC026471.4	1.08341	2.71313	1.62972	4.22097e-228	4.4564e-227
STX1A	4.66376	3.06049	-1.60327	2.63451e-71	4.41862e-71
INTS11	5.80987	3.91375	-1.89612	2.70109e-230	3.384e-229
GSPT2	2.19855	3.90655	1.708	5.0254e-236	1.86185e-234
EDNRB	3.42732	6.32615	2.89883	3.7974e-173	1.2895e-172
AC245297.2	3.10433	0.64372	-2.46061	5.51503e-226	5.17667e-225
ATP5IF1	7.05388	5.31515	-1.73873	9.00363e-229	9.98689e-228
FAM228B	4.24965	2.28326	-1.96639	4.21949e-232	6.5048e-231
ATP6V0C	7.52703	5.58596	-1.94108	2.32731e-226	2.22354e-225
HSPA13	2.97658	4.74244	1.76586	4.34255e-231	5.83854e-230
DNM1	6.44982	3.78205	-2.66777	2.59517e-132	6.29365e-132
SMG1P1	1.80175	0.0354129	-1.76634	5.31914e-236	1.94689e-234
AC116533.1	6.42667	3.99951	-2.42716	4.74156e-223	3.89407e-222
GSTM2	5.80891	3.16796	-2.64095	1.6838e-227	1.69602e-226
HAGH	5.58962	3.72143	-1.86818	9.03159e-231	1.17018e-229
FRMPD3	1.26317	3.0825	1.81934	1.59762e-199	7.49415e-199
CALB1	3.28788	1.00415	-2.28373	3.03408e-141	7.82323e-141
SERF1B	4.94033	0.56756	-4.37277	1.72582e-233	3.85005e-232
ATP5MF	7.64446	5.50656	-2.13789	4.06431e-233	7.43054e-232
AC006466.1	0.489485	2.51263	2.02315	2.18895e-203	1.08915e-202
FP565260.6	2.67646	0.600177	-2.07629	1.86546e-233	3.88712e-232
AC012615.2	2.33673	0	-2.33673	2.04585e-212	1.23232e-211
CHD5	3.69017	2.05988	-1.63029	8.5859e-85	1.56249e-84
HECTD4	4.80288	3.06854	-1.73433	1.94573e-225	1.77506e-224
PPP1R14BP3	1.01027	4.54875	3.53848	6.78969e-238	4.37983e-236
LRRC37A2	3.24318	0.818541	-2.42464	2.16018e-232	3.47443e-231
SYTL1	1.91314	0.182797	-1.73034	1.95999e-208	1.07619e-207
GRM5-AS1	2.11802	0.0211923	-2.09683	5.11073e-234	1.33385e-232
MICALL2	4.67336	2.26753	-2.40583	1.87338e-211	1.10537e-210
RPS23	9.10357	7.48523	-1.61834	6.13608e-232	9.22313e-231
CASQ1	1.67195	3.28727	1.61532	1.51053e-143	3.96852e-143
PTN	5.9969	8.44116	2.44426	1.93641e-218	1.35795e-217
HSPA1A	6.93605	4.58597	-2.35008	1.08521e-152	3.05449e-152
AC010653.2	2.42789	0.0260711	-2.40182	2.72686e-229	3.13952e-228
NDUFA13	7.06391	4.12524	-2.93868	9.92599e-232	1.45031e-230
NCOA4	4.13693	6.02102	1.88409	8.69456e-235	2.57594e-233
INO80B-WBP1	2.47518	0.0108307	-2.46435	8.07083e-200	3.80156e-199
GPR89A	2.75918	0.821683	-1.93749	2.6094e-233	5.02302e-232
RNU6-30P	0.0234076	2.27269	2.24929	0	0
SLC15A2	2.24429	4.21898	1.9747	1.38332e-155	3.98668e-155
ADORA2A	2.93215	0.107975	-2.82417	1.05981e-233	2.62299e-232
KPNA2P3	2.538	0	-2.538	8.00883e-242	8.67194e-240
LRCH4	4.11355	1.91109	-2.20246	5.01447e-232	7.63972e-231
IFIT2	2.20629	4.14192	1.93563	5.58721e-191	2.32313e-190
IFNGR1	4.01831	5.71609	1.69779	1.25677e-190	5.20535e-190
DGKA	3.73195	1.77301	-1.95895	5.5815e-228	5.83188e-227
AC106795.1	3.23979	1.14859	-2.0912	5.08313e-223	4.17083e-222
NPIPA5	4.71355	1.29873	-3.41482	5.75665e-221	4.36148e-220
LGI4	4.71522	2.76224	-1.95299	7.49962e-151	2.08283e-150
PBXIP1	5.17129	6.78464	1.61335	2.35726e-128	5.57184e-128
AC104116.1	2.15011	0	-2.15011	3.29473e-191	1.37464e-190
AC005062.1	1.75047	0.0207358	-1.72973	7.48446e-237	3.39526e-235
PKD1P1	1.75239	0.00647862	-1.74591	3.20969e-228	3.41847e-227
HIST2H2AA3	3.37973	0.00742001	-3.37231	2.94639e-230	3.66857e-229
SNRPB	4.45142	6.29941	1.84799	3.47255e-236	1.33833e-234
SPSB3	4.69696	1.14611	-3.55085	1.05207e-232	1.79533e-231
BRI3	5.44492	3.72613	-1.71879	1.97167e-220	1.47055e-219
MBP	11.1758	6.3418	-4.83403	5.2835e-205	2.70968e-204
RAB37	2.75665	1.168	-1.58865	2.80805e-109	5.86737e-109
RNF139	2.67402	4.53686	1.86284	2.95779e-238	2.29936e-236
AL627309.6	3.19056	0.980734	-2.20983	6.77111e-217	4.53343e-216
AC012321.1	4.23566	0	-4.23566	5.7577e-246	9.78922e-244
AC125611.3	1.60868	0.00198586	-1.6067	3.18802e-182	1.19229e-181
ARPC4-TTLL3	1.96683	0.2797	-1.68714	2.72544e-231	3.74743e-230
SLC16A9	2.07893	3.9046	1.82567	4.50002e-177	1.59199e-176
DIABLO	4.56485	1.85314	-2.71171	1.80061e-233	3.85005e-232
AC080013.1	2.05535	0.362919	-1.69243	4.28513e-206	2.25617e-205
MAGED4B	5.38224	0.022449	-5.35979	4.19561e-237	2.05721e-235
AC018557.1	2.47207	0	-2.47207	1.06215e-243	1.3234e-241
CKAP4	2.53959	4.5066	1.96701	1.96535e-237	1.05774e-235
NPIPB5	5.9689	0.306754	-5.66215	1.80036e-233	3.85005e-232
CSRP1	7.12893	4.9813	-2.14763	1.7688e-154	5.04407e-154
RTL6	3.06766	5.10273	2.03507	1.2124e-235	4.17703e-234
AHI1	3.97205	1.95109	-2.02095	4.54662e-226	4.28315e-225
AC024267.6	2.25181	0.0410692	-2.21074	5.25131e-235	1.61363e-233
AC087393.2	4.4403	0	-4.4403	4.48489e-241	4.58356e-239
AC009022.1	2.4781	0.862248	-1.61585	1.88268e-225	1.71927e-224
HES6	3.89764	7.65993	3.76228	2.17729e-217	1.48064e-216
SLC24A3	2.67877	4.36993	1.69115	1.78469e-170	5.88565e-170
TEN1	2.58732	0.0923001	-2.49502	3.39278e-234	9.14342e-233
FGF17	3.13635	1.15717	-1.97918	7.07188e-146	1.88933e-145
BBIP1	3.93305	2.05872	-1.87433	7.01198e-233	1.22414e-231
TEDC1	3.15209	1.56453	-1.58756	1.19795e-205	6.23693e-205
CACNB3	4.35126	2.157	-2.19426	4.11612e-177	1.45674e-176
LPAR5	0.97015	2.69312	1.72297	7.30523e-169	2.37727e-168
NTN1	1.42663	4.4869	3.06027	1.7203e-229	2.01376e-228
AQP1	4.69538	6.32277	1.62739	9.10277e-49	1.34297e-48
ANAPC15	4.84183	2.48954	-2.35229	1.20373e-226	1.16474e-225
CPNE6	4.93285	1.90099	-3.03186	1.52179e-190	6.29584e-190
CCND1	2.7375	4.77915	2.04165	4.71578e-174	1.61919e-173
ZBED3	1.79093	3.47919	1.68826	4.77154e-225	4.28426e-224
SMOC1	3.35318	7.41573	4.06255	3.75073e-190	1.54191e-189
FAM153B	3.79241	0.133283	-3.65912	3.84218e-231	5.20813e-230
BBS1	4.01378	0.893447	-3.12034	2.65265e-238	2.11642e-236
NOL12	3.64244	1.63952	-2.00292	1.67731e-231	2.37262e-230
COMMD3	4.58939	2.89122	-1.69817	4.71107e-230	5.75548e-229
TMEM191B	2.03118	0.108744	-1.92243	1.95129e-230	2.47358e-229
CALR	6.11646	8.25177	2.13532	2.96739e-236	1.16086e-234
GET4	4.30043	1.00541	-3.29503	1.81979e-233	3.85005e-232
GUSBP11	3.79636	0.431606	-3.36475	1.92578e-233	3.97637e-232
SLC16A2	2.33075	4.32697	1.99622	9.77277e-238	5.9457e-236
GRM4	2.82491	0.228154	-2.59675	5.27042e-202	2.57173e-201
TOP3B	2.6126	0.131321	-2.48128	1.16593e-233	2.86227e-232
SNORA63	1.85936	0	-1.85936	9.22682e-108	1.90994e-107
FABP6	3.14327	0.967998	-2.17528	2.21131e-176	7.76264e-176
AL121929.2	2.40941	0.792942	-1.61647	6.55011e-146	1.75096e-145
LINC02283	0.865649	4.11493	3.24928	9.78963e-172	3.27479e-171
AGAP2	5.5913	3.99073	-1.60057	2.08587e-94	4.01058e-94
AC068535.1	0.461629	2.58208	2.12046	3.3208e-222	2.63908e-221
TSKU	1.00467	2.77071	1.76603	1.8829e-221	1.45073e-220
ITGAE	4.16	1.98002	-2.17998	3.03728e-233	5.7255e-232
SPP1	5.86496	7.94635	2.08138	6.81369e-78	1.18895e-77
TUBB3	5.84195	2.27301	-3.56894	9.48314e-232	1.38784e-230
STK25	6.28407	4.52321	-1.76086	1.18083e-232	1.99262e-231
RALYL	3.80031	1.60897	-2.19134	1.58542e-174	5.46632e-174
ANKRD13D	4.85697	2.95548	-1.90149	5.79303e-232	8.76713e-231
MYCN	0.959615	3.29096	2.33134	2.15023e-222	1.72388e-221
AC114546.3	3.57717	0	-3.57717	1.87264e-244	2.43331e-242
HERC3	4.03723	2.32311	-1.71411	1.04641e-212	6.34929e-212
MACF1	6.05732	3.75354	-2.30378	2.58949e-233	4.98999e-232
AL390198.2	1.76382	0.16825	-1.59557	8.12937e-187	3.21202e-186
PMP2	5.6039	8.68941	3.08551	1.24845e-215	8.108e-215
GLUD1	6.22696	7.8563	1.62934	5.213e-145	1.38438e-144
SPON1	2.94998	5.5768	2.62682	3.62241e-182	1.35364e-181
ZNHIT3	4.68196	2.82452	-1.85744	1.81968e-233	3.85005e-232
FGF13	3.31192	1.21289	-2.09903	4.93936e-86	9.0531e-86
LRP10	3.0605	4.96439	1.90389	7.90331e-207	4.2161e-206
COX7A2L	5.71125	4.0199	-1.69135	9.43244e-232	1.38153e-230
ZNF22	2.78523	4.4762	1.69097	4.84921e-229	5.4995e-228
MYBL2	0.0853567	1.75266	1.66731	4.22802e-210	2.41861e-209
EZR	4.33043	7.0158	2.68537	1.29947e-195	5.74311e-195
AC245595.1	4.13394	0.508097	-3.62584	5.99046e-230	7.25516e-229
PRKX	1.66524	3.47313	1.80789	4.03009e-190	1.656e-189
ATP5MPL	6.91257	4.28191	-2.63066	6.23556e-233	1.10127e-231
SMN2	3.53907	1.07808	-2.46099	1.26002e-191	5.30455e-191
AL118505.1	0.707899	3.24265	2.53475	4.12443e-163	1.26929e-162
UBL3	4.27965	5.93497	1.65533	8.67891e-221	6.55096e-220
LINC00689	0.244252	2.22849	1.98423	3.73026e-131	8.97938e-131
SPTBN4	5.05155	2.33575	-2.7158	2.23129e-213	1.37173e-212
SRCIN1	4.52908	2.74808	-1.781	6.24209e-153	1.76019e-152
DOLK	1.88254	4.12058	2.23804	2.32026e-238	1.99795e-236
VIPR2	0.99875	3.08034	2.08159	1.2237e-126	2.85646e-126
BBS10	2.06777	3.6586	1.59083	3.57938e-233	6.65092e-232
PYGB	5.27566	7.11486	1.8392	6.8712e-227	6.72734e-226
IFIT3	2.86198	5.00815	2.14617	9.86775e-206	5.14634e-205
LINC00599	5.48447	2.13227	-3.3522	3.51743e-187	1.39706e-186
RPP21	4.77057	2.64343	-2.12714	8.9868e-231	1.16604e-229
AC010649.1	2.56102	0.0138006	-2.54722	1.76283e-175	6.12913e-175
RPL17-C18orf32	2.56998	0.0218519	-2.54813	1.89087e-234	5.29997e-233
SERGEF	5.53541	3.28864	-2.24677	8.12209e-232	1.19829e-230
NEIL1	4.76076	1.98247	-2.77829	6.57304e-237	3.01041e-235
CCL3L1	0.651191	2.55912	1.90793	6.04458e-122	1.36762e-121
TPT1-AS1	4.10467	1.55674	-2.54793	1.81101e-232	2.95463e-231
ABL1	3.39109	5.12942	1.73833	1.14174e-229	1.35305e-228
MIR647	0.000124845	3.39556	3.39544	0	0
MXRA7	5.65184	3.22855	-2.42329	2.54499e-230	3.19502e-229
CKS2	2.27407	4.01808	1.74401	3.274e-180	1.19762e-179
RN7SL1	7.14128	0	-7.14128	5.755e-246	9.78922e-244
SMU1	2.5304	4.1354	1.605	2.32843e-238	1.99795e-236
MMGT1	2.42333	4.0428	1.61947	2.50992e-233	4.86241e-232
CIB1	4.23941	5.83756	1.59814	8.27878e-198	3.78676e-197
PPP2R2C	5.44509	3.04458	-2.40051	1.6645e-178	5.96394e-178
DSCAM	1.57144	3.4995	1.92806	1.83572e-185	7.12624e-185
CDH20	2.81372	4.72099	1.90726	1.07678e-185	4.19349e-185
AC087190.3	2.24558	0	-2.24558	2.52608e-243	2.92691e-241
ZNF177	2.19359	0.0804342	-2.11315	1.8416e-232	2.99884e-231
RNU6-722P	0.000124845	1.90037	1.90025	0	0
SNX18	1.97373	3.68018	1.70645	4.52666e-218	3.13574e-217
PYURF	4.67764	1.81675	-2.86089	3.16872e-233	5.95477e-232
RNASEK	7.30721	2.32099	-4.98622	1.79143e-233	3.85005e-232
HK2	0.886062	2.66866	1.7826	3.15897e-181	1.16893e-180
COL9A3	4.45794	2.51622	-1.94172	2.38248e-110	5.01038e-110
RPL31	9.55856	6.66737	-2.89119	2.02915e-233	4.09975e-232
NBL1	5.19977	3.25167	-1.9481	3.77055e-177	1.33496e-176
HTRA1	6.78533	8.65379	1.86846	4.73489e-190	1.94517e-189
GALNT15	3.14095	4.9752	1.83425	2.44572e-130	5.8578e-130
RPL41P5	0.000124845	5.32292	5.32279	0	0
DMKN	3.27355	0.438664	-2.83489	1.09668e-234	3.18686e-233
RNU6-510P	0.000124845	1.65258	1.65246	0	0
RNU6-925P	0.000124845	2.03139	2.03126	0	0
H2AFJ	3.77749	2.07492	-1.70257	3.01269e-185	1.16579e-184
AC123768.4	1.94365	0.0722034	-1.87145	5.97177e-236	2.17474e-234
AARSD1	4.6709	1.6232	-3.0477	1.80057e-233	3.85005e-232
TCEAL6	4.76425	2.48984	-2.27441	1.58192e-149	4.34693e-149
CPXM1	0.36725	4.64764	4.28039	2.38731e-234	6.59993e-233
AC138035.1	1.93551	0.317286	-1.61823	1.62717e-225	1.49268e-224
PSMC1P5	3.9546	0.0792496	-3.87535	6.52674e-211	3.79201e-210
TSPAN11	1.53988	4.05612	2.51624	4.98503e-219	3.55758e-218
AC127459.3	2.57853	0	-2.57853	1.37693e-245	2.19718e-243
NRAS	2.35035	4.11681	1.76646	9.6875e-235	2.85616e-233
SOX21-AS1	1.31465	3.26941	1.95475	3.68775e-222	2.9256e-221
FXYD1	6.55138	1.52581	-5.02557	2.077e-232	3.34657e-231
ARMCX7P	2.28338	0.0514242	-2.23196	1.9248e-224	1.68255e-223
AC073896.4	2.5201	4.50476	1.98466	2.35554e-228	2.5415e-227
GALT	4.42619	2.49631	-1.92987	3.13849e-232	4.9345e-231
AC093330.1	6.28564	0.0444688	-6.24117	1.25258e-232	2.09814e-231
HPCAL1	5.74571	3.23481	-2.51091	1.03077e-197	4.70771e-197
MYL5	3.56224	1.953	-1.60924	1.50062e-211	8.88308e-211
SNORD62B	0.000124845	1.74344	1.74331	0	0
RPS6KL1	4.05681	2.39003	-1.66677	8.19735e-218	5.63986e-217
THUMPD3-AS1	3.86517	2.10442	-1.76075	4.1898e-232	6.46451e-231
NQO2	4.0614	1.87196	-2.18945	2.14859e-233	4.28095e-232
AC132217.1	2.05566	0	-2.05566	3.37974e-242	3.74884e-240
SNORD14A	0.000124845	2.71782	2.7177	0	0
PCNA	3.70676	5.62627	1.91951	5.64736e-234	1.45718e-232
PAK2	2.92069	4.83625	1.91555	1.23852e-235	4.25897e-234
UHRF1	0.639407	2.92887	2.28946	4.49951e-226	4.24317e-225
AC022336.2	1.67489	0	-1.67489	5.75805e-246	9.78922e-244
ROGDI	6.13824	4.25926	-1.87898	6.8252e-211	3.96036e-210
ASTN1	3.36534	5.0449	1.67956	1.75712e-198	8.13326e-198
PRR4	2.90725	0.550291	-2.35696	1.82637e-233	3.85005e-232
ATXN2	4.39987	2.6272	-1.77267	1.81982e-233	3.85005e-232
BEST3	1.15619	2.79898	1.6428	7.30044e-135	1.79827e-134
PRSS3	3.7304	1.42801	-2.3024	7.3609e-168	2.37499e-167
SMIM12	3.96411	2.26751	-1.69659	7.89795e-232	1.16617e-230
ID4	4.10651	7.75244	3.64593	3.80318e-222	3.01585e-221
ENOSF1	3.60062	1.31047	-2.29015	1.65715e-214	1.04635e-213
ZFP36L2	3.15475	5.67765	2.5229	3.56372e-221	2.71814e-220
EMC6	4.24765	2.41173	-1.83592	1.01909e-227	1.04441e-226
AC013489.3	1.84166	0.109342	-1.73232	2.72868e-213	1.67524e-212
LRRFIP2	4.71465	3.05673	-1.65792	1.27913e-237	7.38687e-236
MTHFD2	2.05295	4.57637	2.52342	1.46818e-180	5.39113e-180
NRARP	1.73626	3.49674	1.76048	9.55373e-186	3.72464e-185
SMIM11B	3.85335	0.00270335	-3.85065	9.59358e-239	8.76969e-237
GPS2	5.08127	1.9775	-3.10377	1.83907e-233	3.85865e-232
AC099850.3	0.14537	2.00006	1.85469	5.96491e-251	1.46632e-248
CPT1C	5.29425	3.6558	-1.63845	1.59089e-209	8.98473e-209
RPL27A	8.51796	6.36603	-2.15192	1.58509e-230	2.02063e-229
SOX9-AS1	2.75254	1.11523	-1.63731	6.44255e-197	2.91099e-196
RN7SL471P	1.89782	0.165071	-1.73275	9.24571e-181	3.4005e-180
CCDC78	3.18186	1.48346	-1.69839	2.55156e-174	8.78081e-174
NDST2	3.18994	0.764283	-2.42566	1.80068e-233	3.85005e-232
MASP1	1.77849	3.70863	1.93014	1.53491e-170	5.06467e-170
EPS8L2	3.2666	1.42991	-1.83669	7.0321e-197	3.175e-196
AC067773.1	1.94349	0.0630288	-1.88046	1.39932e-234	4.02132e-233
AC053503.1	0.247924	3.10932	2.8614	1.12723e-211	6.688e-211
RNA5-8SN3	8.23435	0.00268595	-8.23166	2.08446e-243	2.47832e-241
AC136475.2	0.953902	2.9861	2.0322	6.96182e-200	3.28259e-199
FAM167A	2.78068	4.45095	1.67027	1.32053e-149	3.63086e-149
NDUFA6-DT	2.92614	1.15267	-1.77347	2.50486e-231	3.46509e-230
HMGN2P5	4.03025	1.52238	-2.50788	6.18266e-230	7.47798e-229
LRRC8A	4.51094	6.7654	2.25445	1.93262e-217	1.31672e-216
C1QL4	0.207752	1.83339	1.62563	3.27738e-171	1.08873e-170
TTN-AS1	2.36483	0.240907	-2.12392	2.8987e-234	7.88194e-233
TGFBR3L	2.97303	0.665585	-2.30744	9.3606e-196	4.14808e-195
IDH3A	5.00033	2.59526	-2.40507	1.80057e-233	3.85005e-232
CRYBB2P1	3.55071	1.7875	-1.76321	5.51983e-225	4.93669e-224
RALGAPA1	3.72949	2.02854	-1.70095	1.86545e-233	3.88712e-232
PSPHP1	0.129798	2.3535	2.22371	2.19576e-92	4.17466e-92
AC090617.5	0.823441	2.59188	1.76844	4.80514e-231	6.42723e-230
ADAP1	5.33065	2.22863	-3.10203	2.49132e-232	3.96497e-231
AC073864.1	3.53059	0	-3.53059	1.37693e-245	2.19718e-243
TOB2	3.76944	5.38361	1.61418	5.92157e-192	2.50219e-191
RIN2	2.47739	4.73462	2.25723	2.24943e-227	2.25203e-226
AC096636.1	1.60717	0	-1.60717	3.28977e-245	4.86538e-243
AP003396.5	3.8836	0	-3.8836	8.86453e-194	3.82937e-193
TNFRSF19	0.708262	2.61178	1.90352	2.10998e-218	1.47853e-217
CYBB	1.24338	3.70591	2.46253	1.62711e-193	6.99072e-193
SH3PXD2B	1.98508	3.60127	1.61619	2.83528e-215	1.82314e-214
AC011462.1	2.44883	4.13488	1.68605	9.88041e-167	3.15379e-166
RTEL1	2.74418	0.314539	-2.42964	1.78179e-233	3.85005e-232
AC011603.2	6.05858	0.0809093	-5.97767	8.62633e-229	9.59178e-228
ARL6IP4	6.77335	1.14278	-5.63057	1.80143e-233	3.85005e-232
MSTN	0.437639	2.58004	2.1424	1.75001e-171	5.83903e-171
RPS27L	4.8451	2.81721	-2.02789	4.75662e-226	4.47866e-225
RAB41	0.727795	2.56355	1.83575	1.04491e-233	2.59317e-232
TTC9B	4.95905	2.94656	-2.01249	2.49904e-138	6.31566e-138
KCNH3	3.99912	2.25479	-1.74432	4.40977e-85	8.0379e-85
GARS-DT	4.66385	1.38994	-3.27391	3.61111e-233	6.69621e-232
PABPC1L2B-AS1	1.78875	0.00470456	-1.78405	2.34351e-237	1.2321e-235
RPL22P1	4.6698	1.65799	-3.01181	2.38035e-228	2.56674e-227
PPP1R12C	5.90715	3.78748	-2.11967	9.92724e-231	1.28075e-229
POLDIP2	4.6456	6.33951	1.69391	2.28681e-238	1.99795e-236
COQ6	3.5692	1.56467	-2.00453	1.84577e-233	3.8638e-232
PHYHIP	6.23552	4.09824	-2.13729	1.19076e-94	2.29195e-94
ABHD4	2.83263	4.97486	2.14223	3.42919e-228	3.64159e-227
CDK10	5.28714	3.18458	-2.10256	2.4694e-226	2.35805e-225
ZNF629	2.07976	3.7798	1.70003	2.30373e-238	1.99795e-236
FXYD7	5.49597	2.91567	-2.58031	2.97856e-124	6.83352e-124
ASPH	4.91805	3.33259	-1.58546	2.75869e-218	1.92494e-217
IGFBP7	5.52172	7.53216	2.01045	1.13006e-168	3.67219e-168
CXorf40A	3.24749	1.48218	-1.76531	1.81866e-231	2.55469e-230
CDRT4	2.72871	0.103068	-2.62565	8.61863e-235	2.55761e-233
FAM27E3	2.41802	0.575718	-1.84231	1.01458e-230	1.30802e-229
LHFPL3	2.01053	5.41009	3.39956	1.54883e-190	6.40627e-190
PPT1	4.96744	6.62862	1.66117	5.14066e-237	2.46089e-235
AL133304.3	0.38267	2.10768	1.72501	1.29944e-196	5.83944e-196
ETV1	3.2699	5.25886	1.98896	3.46945e-113	7.42153e-113
MAGEH1	4.51432	6.35929	1.84497	2.72907e-212	1.63843e-211
AC016596.2	0.000124845	3.04987	3.04975	0	0
SMAD2	3.66079	1.95332	-1.70746	6.08521e-231	8.03309e-230
HBA1	6.37308	0.802564	-5.57051	2.69623e-231	3.71007e-230
RGN	3.822	2.1556	-1.6664	3.71286e-149	1.01672e-148
MAP4K3-DT	3.45286	1.2692	-2.18366	1.91053e-231	2.67548e-230
BLOC1S5-TXNDC5	2.18749	0.168474	-2.01902	8.51376e-226	7.9098e-225
HIP1	2.72387	4.63285	1.90898	2.79286e-205	1.43923e-204
SERF1A	2.24242	0.0722728	-2.17015	3.91827e-236	1.49115e-234
PASK	2.68999	0.974545	-1.71544	3.33283e-202	1.6324e-201
GCSH	5.10933	3.38481	-1.72452	3.60973e-180	1.31883e-179
H1F0	5.11792	7.6479	2.52999	6.10626e-232	9.19528e-231
SLC25A1	3.96307	5.83475	1.87167	2.73069e-218	1.90614e-217
PTPN5	4.17168	2.03917	-2.1325	4.02238e-77	6.98864e-77
TMEM178B	1.80634	3.5446	1.73826	6.65674e-214	4.13992e-213
AC008264.2	2.9194	0.057717	-2.86168	2.10913e-235	6.91471e-234
OBSCN-AS1	1.86498	0.265499	-1.59948	1.2026e-169	3.93532e-169
GMIP	1.21394	2.81067	1.59673	3.33379e-224	2.8851e-223
ILF2	4.87526	6.80541	1.93015	3.81106e-237	1.88902e-235
GPI	6.75899	5.09086	-1.66813	3.20504e-207	1.72392e-206
PPP1R1A	4.4095	2.77368	-1.63582	3.24715e-97	6.33923e-97
TOMM5	5.02412	2.57453	-2.44959	1.82615e-233	3.85005e-232
AC239809.3	2.24929	0.186344	-2.06295	1.37176e-233	3.3139e-232
ILK	5.10256	2.31964	-2.78292	1.80039e-233	3.85005e-232
IFI27	5.65218	3.46813	-2.18405	2.02913e-191	8.51093e-191
ACAD11	3.12943	0.340273	-2.78916	1.76297e-233	3.85005e-232
AC004890.2	3.16562	1.55259	-1.61303	3.27392e-207	1.76044e-206
IGSF3	0.940238	2.67286	1.73262	7.39552e-171	2.44603e-170
AK1	6.45899	3.46249	-2.99651	3.53623e-228	3.75088e-227
AC138649.1	3.10037	1.1287	-1.97167	9.55523e-192	4.02825e-191
SMO	1.91198	3.49919	1.58721	2.33346e-194	1.01502e-193
STAG3L5P-PVRIG2P-PILRB	4.91641	0.916502	-3.99991	1.84577e-233	3.8638e-232
SYK	0.749718	2.55768	1.80796	4.09321e-194	1.77454e-193
C1orf226	1.2016	2.98407	1.78247	1.26738e-205	6.58901e-205
UBE2C	0.27824	2.46801	2.18977	2.49339e-196	1.1158e-195
SELPLG	1.90957	4.39006	2.48049	2.40468e-183	9.11705e-183
XRN2	2.86639	4.74705	1.88065	3.28031e-238	2.43564e-236
NOTCH2NLA	1.87549	0.130184	-1.7453	1.99155e-233	4.05238e-232
SPSB1	1.75481	3.5625	1.80769	2.24383e-193	9.62223e-193
CSF1R	2.62414	5.32082	2.69668	7.15461e-179	2.57212e-178
AC016590.1	1.84	0.24595	-1.59405	5.3617e-232	8.12789e-231
ANOS1	1.65347	4.0365	2.38304	3.42684e-201	1.65002e-200
GRIK4	1.54868	3.28267	1.73399	1.32552e-221	1.02694e-220
TUNAR	2.65592	1.05907	-1.59685	7.75822e-107	1.59776e-106
BEX5	4.96209	3.20987	-1.75222	1.74437e-102	3.50512e-102
SOX11	0.532922	3.02695	2.49403	9.10912e-223	7.41405e-222
KIF7	1.06399	2.70427	1.64027	1.17784e-232	1.98943e-231
COX4I1	8.48639	6.47869	-2.0077	7.66105e-233	1.32979e-231
AL121845.2	2.19403	0.00412225	-2.1899	5.84201e-224	4.98228e-223
ADGRG1	4.87555	6.93229	2.05673	2.17265e-193	9.32138e-193
MARCKSL1	6.54785	9.15907	2.61123	1.12108e-221	8.71517e-221
CLASRP	5.31382	3.39007	-1.92375	1.5843e-227	1.59756e-226
GDPD5	3.11123	1.23663	-1.8746	2.05327e-212	1.23597e-211
NRN1L	1.72857	0.0222243	-1.70635	5.91063e-235	1.80403e-233
SRGAP2B	3.06322	1.03469	-2.02853	1.81629e-229	2.11796e-228
CDR1	2.49539	0.652871	-1.84252	4.42126e-214	2.76287e-213
BORCS8	3.85432	1.97552	-1.8788	6.80867e-229	7.63603e-228
CAPRIN2	4.1565	2.52271	-1.63379	3.07009e-213	1.88358e-212
DAG1	3.2318	5.39552	2.16372	9.50045e-237	4.20493e-235
FBXO17	2.87215	1.17668	-1.69546	1.09195e-152	3.07296e-152
ARHGAP44	3.37192	1.59407	-1.77785	1.76621e-158	5.21407e-158
TMX1	2.10788	4.03491	1.92703	1.02658e-233	2.55815e-232
RARRES2	4.48692	1.85297	-2.63395	3.57179e-153	1.00955e-152
PSD	6.30557	4.26201	-2.04356	2.28845e-110	4.81374e-110
DNAAF1	2.38999	0.605546	-1.78444	2.0998e-197	9.53983e-197
AC115837.1	0.76167	2.45826	1.69659	1.04105e-232	1.7782e-231
DNAJC7	5.58495	3.70914	-1.87581	1.79999e-233	3.85005e-232
RGCC	5.57983	7.4316	1.85177	3.09985e-162	9.46606e-162
RIMS1	3.26127	1.24848	-2.01279	1.26995e-144	3.36269e-144
TENM4	1.28671	2.88825	1.60154	6.89043e-200	3.24977e-199
AC018738.1	0.243051	4.24643	4.00338	6.83292e-253	1.75067e-250
MDH1	7.21893	5.32809	-1.89083	3.93069e-200	1.85964e-199
GIT2	3.54873	1.72866	-1.82008	9.31925e-232	1.36715e-230
FAM45A	3.7905	2.10132	-1.68918	2.16377e-233	4.30176e-232
AL627309.5	1.6657	0.0248432	-1.64086	2.57366e-234	7.09356e-233
ITGAV	3.36378	5.34236	1.97857	1.82159e-227	1.83277e-226
RIIAD1	2.46393	0.875106	-1.58883	9.66047e-148	2.61937e-147
IZUMO4	3.7932	2.19489	-1.59831	5.59511e-189	2.26683e-188
YES1	2.41335	4.16889	1.75554	1.25276e-205	6.51859e-205
HNRNPA0	2.93628	4.99589	2.05961	2.32023e-238	1.99795e-236
WFDC2	2.63053	0.991982	-1.63855	9.64292e-172	3.22631e-171
CCL4L2	0.823725	2.77934	1.95561	5.05797e-115	1.09535e-114
ZEB1	3.3454	5.27559	1.93019	2.37539e-217	1.61354e-216
SLC12A5	5.81752	2.23428	-3.58324	1.13789e-195	5.03635e-195
AC063919.1	0.0336149	1.73766	1.70405	0	0
ZBED1	2.9354	4.7948	1.8594	3.61411e-237	1.80616e-235
AC005912.1	2.07377	3.91544	1.84167	3.87266e-165	1.21482e-164
C5orf15	2.99968	4.59601	1.59633	2.37947e-235	7.71567e-234
GRIK3	1.66784	4.177	2.50916	1.45845e-219	1.0608e-218
DBP	4.53981	2.56614	-1.97366	2.76633e-212	1.66026e-211
OBSCN	2.89026	0.399013	-2.49124	1.42456e-227	1.43968e-226
AC020909.2	1.89798	0	-1.89798	3.27617e-239	3.08791e-237
AL139300.1	2.04697	0.0168458	-2.03013	1.4861e-167	4.77879e-167
KIAA1549	0.93524	2.84693	1.91169	4.55833e-228	4.79865e-227
STAG3L3	2.85922	0.622735	-2.23649	1.93945e-233	3.98701e-232
AC066612.2	1.7832	0.114491	-1.66871	1.21524e-227	1.23707e-226
C3orf14	4.42433	2.38392	-2.04041	8.08053e-227	7.88589e-226
PRKCG	3.75845	2.03785	-1.7206	1.59823e-77	2.78322e-77
ADIRF	4.96224	8.99376e-05	-4.96215	1.45463e-245	2.30097e-243
WDR73	2.73507	0.962079	-1.77299	1.80068e-233	3.85005e-232
CALCRL	1.34802	4.39246	3.04444	7.61913e-209	4.23205e-208
OPALIN	4.14997	2.4303	-1.71967	5.09711e-60	8.02506e-60
BTBD17	1.18066	4.47468	3.29402	8.6132e-218	5.91702e-217
SPINT2	4.92979	2.4421	-2.48769	4.64381e-218	3.21566e-217
MTLN	4.8273	3.05306	-1.77424	6.81565e-214	4.2373e-213
F2R	0.498301	4.21292	3.71462	1.04956e-237	6.30116e-236
SERINC5	2.24659	4.62365	2.37705	9.71242e-219	6.86931e-218
SLIT1	2.68805	4.94036	2.25231	3.58637e-141	9.23944e-141
VAX2	1.08049	3.42747	2.34698	2.42358e-183	9.18676e-183
BRSK2	5.14274	3.33728	-1.80546	5.6472e-194	2.44417e-193
N4BP2L2	4.29736	2.69433	-1.60303	1.87199e-233	3.89182e-232
PDE1B	4.13081	1.72673	-2.40408	5.74762e-150	1.58393e-149
AC093525.6	2.61482	0.284006	-2.33081	1.77852e-234	5.01597e-233
HERC2P2	5.38789	3.04741	-2.34047	3.98651e-205	2.04913e-204
PDLIM2	4.61626	1.68755	-2.9287	1.77307e-232	2.89792e-231
DTX3L	1.23614	2.92548	1.68934	9.16882e-212	5.44531e-211
OSGIN2	2.26061	4.54447	2.28386	3.9584e-229	4.51173e-228
TNNI3K	2.09052	0.182182	-1.90834	1.31482e-233	3.19759e-232
AL121827.2	2.05907	4.8178	2.75872	1.33859e-179	4.85548e-179
GOLT1A	2.0899	0.45046	-1.63944	6.9069e-180	2.51186e-179
GAS1	1.08066	3.10557	2.02492	3.81554e-229	4.35436e-228
GALNT9	3.76355	2.13497	-1.62857	3.14671e-56	4.85347e-56
ANK3	4.89437	1.72495	-3.16942	1.39445e-228	1.52443e-227
AS3MT	2.24618	0.34077	-1.90541	1.95024e-232	3.15911e-231
NDUFA10	5.78797	3.89469	-1.89327	1.81233e-233	3.85005e-232
POU3F3	3.32429	5.30596	1.98167	3.19491e-234	8.62293e-233
LRRC55	0.696631	2.76736	2.07073	2.92057e-196	1.30568e-195
KCTD1	3.88213	2.27679	-1.60534	4.68824e-175	1.62414e-174
UST	2.37784	4.69229	2.31445	8.38245e-200	3.9463e-199
KCNC4	2.79203	0.727007	-2.06502	3.39153e-212	2.03146e-211
LYSMD4	2.992	1.33899	-1.65301	1.82512e-231	2.56178e-230
RNA5-8SN2	8.23435	0.0020879	-8.23226	2.08446e-243	2.47832e-241
CYHR1	5.21034	3.47426	-1.73609	2.31948e-226	2.21722e-225
ARHGDIG	5.95562	3.34637	-2.60924	4.03297e-183	1.52492e-182
MIR6071	0.000124845	2.03793	2.0378	0	0
SOX6	1.26345	3.00353	1.74008	4.04217e-198	1.86013e-197
RFTN2	2.99251	4.76027	1.76777	1.62755e-189	6.63529e-189
PGAM1	6.82104	4.81528	-2.00576	4.91955e-233	8.88694e-232
MIR186	0.000124845	1.98273	1.98261	0	0
JADE3	1.07026	2.88704	1.81679	3.17106e-215	2.0333e-214
SLC26A10	2.89944	0.816788	-2.08265	2.25037e-198	1.03926e-197
C4A	4.43205	2.10851	-2.32354	4.98262e-167	1.59407e-166
HSPA1B	6.62354	4.40363	-2.2199	9.34592e-140	2.38479e-139
CNPY3	3.91269	5.96409	2.0514	1.43876e-237	8.12808e-236
PLVAP	0.657853	2.83266	2.1748	5.24005e-225	4.69334e-224
KLHL25	1.79306	3.54903	1.75596	7.87325e-208	4.27401e-207
MIR7-3HG	3.08356	1.1873	-1.89626	1.1033e-130	2.64743e-130
PEX12	1.90941	3.6677	1.75829	1.37784e-236	5.73554e-235
H2AFY2	2.3805	4.41956	2.03906	2.33389e-167	7.49328e-167
CPT1B	3.80011	0.812166	-2.98795	1.41495e-232	2.33993e-231
ILF3-DT	3.53127	5.11838	1.58711	1.01255e-224	8.94139e-224
SH2D5	2.8342	1.18295	-1.65126	1.273e-85	2.32735e-85
GATD3B	4.98607	0.794755	-4.19132	1.40905e-228	1.53946e-227
VAV2	2.00654	3.7433	1.73676	1.99294e-229	2.31209e-228
RNU1-28P	3.58609	0.0150724	-3.57102	1.52502e-231	2.17071e-230
TSPOAP1	5.57711	3.49677	-2.08034	2.63408e-184	1.01026e-183
AC133555.4	1.71527	0.0496856	-1.66558	1.40302e-63	2.25602e-63
CERS5	5.39326	3.34393	-2.04933	1.1987e-232	2.01546e-231
CH25H	1.24553	2.95503	1.7095	7.17105e-105	1.46063e-104
AC026464.6	1.75476	0	-1.75476	6.00232e-243	6.82436e-241
ST7-AS1	0.735655	2.32398	1.58833	1.55954e-228	1.69777e-227
SH3YL1	4.11834	2.47578	-1.64256	7.41908e-233	1.29149e-231
AC091057.3	2.24523	0.116384	-2.12884	4.01635e-234	1.07443e-232
SLC35B2	3.40737	5.25633	1.84896	1.07838e-235	3.75083e-234
PNCK	4.67701	2.15575	-2.52126	6.90855e-191	2.86795e-190
SOAT1	1.2923	2.93225	1.63995	1.28821e-230	1.65027e-229
RNU1-2	3.59138	0.0557204	-3.53566	4.52882e-226	4.26859e-225
TMEM47	3.22347	4.95879	1.73532	1.19976e-133	2.93423e-133
AC093752.1	3.45666	1.61279	-1.84387	3.00538e-233	5.68304e-232
RBM34	4.48862	0.972717	-3.5159	1.80061e-233	3.85005e-232
AC241585.1	1.00145	3.02464	2.02319	1.14497e-231	1.65566e-230
PTK2B	4.89753	3.25011	-1.64742	3.52598e-107	7.27307e-107
LDLRAD3	2.45475	4.60488	2.15013	5.52384e-219	3.93901e-218
PSMD9	3.88144	1.78487	-2.09656	2.21017e-233	4.37488e-232
YJEFN3	5.42348	2.30573	-3.11775	4.48711e-211	2.618e-210
USP32P1	3.92144	0.268162	-3.65328	1.95337e-234	5.44998e-233
MATK	3.48868	1.70122	-1.78746	9.64789e-97	1.87866e-96
GOLGA6L5P	1.89407	0.20506	-1.68901	2.37205e-233	4.63978e-232
GSX1	0.191541	1.80166	1.61012	1.51165e-163	4.67343e-163
SCD5	6.39751	8.71306	2.31555	2.46167e-220	1.83076e-219
RNA5-8SN1	8.23435	0.00052899	-8.23382	1.59066e-243	1.92904e-241
TGFB2-OT1	2.19693	0	-2.19693	5.75805e-246	9.78922e-244
SIGLEC8	0.861176	3.12509	2.26391	3.19911e-188	1.28551e-187
PLA2G4B	3.29558	0.292046	-3.00353	1.70178e-233	3.85005e-232
TMEM119	1.19699	3.45146	2.25448	1.64982e-171	5.50678e-171
ATRN	2.76874	4.37809	1.60935	1.29242e-235	4.42757e-234
UGP2	5.52481	3.83808	-1.68673	1.96243e-205	1.0159e-204
CD38	1.19842	3.46654	2.26813	3.05142e-175	1.05932e-174
PCDH17	1.87118	4.10751	2.23633	1.55789e-231	2.2123e-230
SCARB2	4.68688	6.69792	2.01104	2.63578e-227	2.6287e-226
AL049839.2	3.10703	0.619965	-2.48707	5.79754e-130	1.38567e-129
PKP4	5.82239	4.11797	-1.70442	2.21329e-202	1.08699e-201
JMJD7	2.6339	0.0667953	-2.5671	6.44275e-235	1.95727e-233
CNTNAP3B	1.7786	0.0831438	-1.69545	9.18427e-234	2.314e-232
SLC27A5	4.0241	1.52386	-2.50024	3.52559e-232	5.50506e-231
OLFML3	1.60446	3.93083	2.32637	1.16475e-201	5.65316e-201
CD14	2.81898	5.20567	2.38669	1.92508e-159	5.7249e-159
MTG1	3.5623	1.61984	-1.94246	4.61537e-233	8.37071e-232
SERPINE1	0.974514	2.64673	1.67221	1.96907e-112	4.19381e-112
CADPS	4.559	2.87041	-1.68859	1.33985e-153	3.80059e-153
MIR3677	0.000124845	1.8236	1.82347	0	0
AC011477.3	1.05655	2.81115	1.7546	6.02193e-224	5.12851e-223
BCO2	2.60849	0.588777	-2.01972	1.16675e-228	1.28012e-227
RPL18A	8.19977	6.40008	-1.79969	3.29246e-220	2.44162e-219
TTC7B	5.32146	1.87426	-3.4472	1.80052e-233	3.85005e-232
RNU2-2P	2.02708	0	-2.02708	2.4111e-188	9.70574e-188
PALD1	2.45585	4.40559	1.94974	4.57492e-223	3.75891e-222
CCDC85C	3.66671	2.00564	-1.66107	7.21291e-218	4.97196e-217
AC126407.1	0.112315	1.70256	1.59025	1.20971e-226	1.1699e-225
SCHIP1	4.73628	2.27227	-2.46401	1.99495e-233	4.05477e-232
GPC4	1.30424	3.14619	1.84195	5.37556e-208	2.92687e-207
CBWD2	3.74792	1.16466	-2.58327	1.8007e-233	3.85005e-232
DCAKD	4.1317	5.88298	1.75129	4.2183e-230	5.17781e-229
GLDC	2.00308	4.06048	2.05739	9.82503e-222	7.64772e-221
ARPIN-AP3S2	2.69334	0.411479	-2.28186	1.6311e-233	3.85005e-232
PRRX1	2.19181	4.10574	1.91393	4.47609e-201	2.14841e-200
AC234031.1	4.07749	0.00331589	-4.07417	1.61184e-238	1.45875e-236
AL358781.1	4.23259	0	-4.23259	1.87263e-244	2.43331e-242
AIF1	3.16522	4.87668	1.71145	5.15571e-102	1.03393e-101
ZC3HAV1	1.45177	3.06182	1.61005	7.24685e-209	4.0265e-208
GAK	5.09198	3.09602	-1.99596	1.94613e-233	3.98701e-232
SPTB	2.66542	0.625179	-2.04024	2.49076e-190	1.02719e-189
DPH1	4.56359	2.93559	-1.628	3.88845e-218	2.6998e-217
MTERF4	4.1326	2.37898	-1.75362	2.11099e-233	4.22453e-232
RASA4B	3.26093	0.127936	-3.13299	1.55726e-234	4.46113e-233
PCSK7	3.80575	1.31952	-2.48623	1.83277e-233	3.85005e-232
TPD52L1	4.89526	2.16026	-2.735	5.46776e-152	1.52974e-151
BOLA2B	4.57138	0.344405	-4.22697	1.63104e-233	3.85005e-232
RNU1-3	3.58609	0.00206804	-3.58403	6.835e-235	2.06195e-233
OLFML2B	0.857073	2.45185	1.59478	2.18948e-166	6.96553e-166
NPM3	2.46642	4.38273	1.91631	2.72706e-226	2.6e-225
ZIC1	4.38346	2.59724	-1.78621	3.54646e-96	6.8844e-96
DGCR2	4.44189	6.31662	1.87473	3.82053e-233	7.02722e-232
AC007744.1	1.90474	0.000929556	-1.90381	1.33986e-244	1.88941e-242
NBPF1	3.66467	1.8504	-1.81428	6.42602e-231	8.45233e-230
KCND2	2.22498	3.89026	1.66528	7.48174e-123	1.70253e-122
LMO7	3.14594	1.05647	-2.08947	4.46651e-206	2.34963e-205
AL110504.1	1.77495	0	-1.77495	1.81158e-238	1.61541e-236
RPL36A	8.07839	3.5653	-4.51309	1.78999e-233	3.85005e-232
TNFRSF6B	2.78987	0	-2.78987	1.00766e-225	9.31895e-225
CALY	5.53345	2.18155	-3.3519	3.56586e-181	1.31869e-180
RNF180	1.3288	3.20543	1.87663	4.52667e-233	8.21804e-232
CSRNP1	2.57593	4.43999	1.86406	2.65471e-190	1.09356e-189
ARHGEF6	2.89201	5.24323	2.35123	7.72358e-220	5.67446e-219
AL513165.1	1.17214	3.98844	2.8163	2.55173e-238	2.07226e-236
MAN2C1	6.09914	3.55355	-2.54559	6.91449e-230	8.32438e-229
DLL1	2.05025	5.01373	2.96349	4.69571e-211	2.73869e-210
XBP1	3.47173	0	-3.47173	5.75784e-246	9.78922e-244
MTHFS	3.24077	1.29418	-1.94659	3.35967e-231	4.58483e-230
HSPH1	5.64068	4.03859	-1.60209	1.29622e-116	2.83476e-116
HIST2H4A	1.66296	0.0344062	-1.62856	6.73768e-228	6.99173e-227
AF129408.1	2.08004	0	-2.08004	2.50254e-240	2.46074e-238
FMNL1	3.65278	2.03037	-1.62242	7.08806e-196	3.14946e-195
RPS7	7.87037	5.9037	-1.96667	3.68834e-231	5.0108e-230
GFAP	9.90267	12.4178	2.51514	9.27149e-132	2.24249e-131
CFC1	1.78047	0.0348215	-1.74565	2.99175e-232	4.71194e-231
AFMID	4.32233	2.65931	-1.66302	1.53239e-194	6.67362e-194
C1QA	3.34165	6.70555	3.3639	4.34824e-191	1.81128e-190
AL583722.2	3.54229	0	-3.54229	3.28969e-245	4.86538e-243
CAMTA1	5.04657	3.2722	-1.77437	1.11514e-223	9.3654e-223
U2AF1	4.30693	0.0968191	-4.21011	1.02523e-234	2.99356e-233
INTS5	1.8379	3.83143	1.99353	2.37048e-238	1.99928e-236
AC006449.7	4.01581	0	-4.01581	3.28967e-245	4.86538e-243
PODXL2	4.77719	6.49325	1.71606	3.81119e-190	1.56641e-189
AC004540.2	2.01816	4.33873	2.32057	6.65469e-124	1.5229e-123
TIMP3	4.2682	2.07144	-2.19676	1.47645e-190	6.11104e-190
RPRML	2.48787	0.773706	-1.71417	2.39938e-103	4.84e-103
NAGLU	2.4688	4.16087	1.69207	7.15146e-228	7.40422e-227
TOX3	0.857536	2.63361	1.77607	1.03386e-170	3.41695e-170
SOX10	4.01713	0	-4.01713	5.75791e-246	9.78922e-244
AC006011.1	1.6229	0	-1.6229	6.00371e-233	1.06448e-231
SLIRP	6.27848	3.70515	-2.57333	6.88178e-233	1.20256e-231
IPPK	2.76511	1.17617	-1.58895	2.40581e-233	4.69069e-232
TNC	1.03613	4.61313	3.577	7.6236e-216	4.97778e-215
CRKL	3.80319	5.58384	1.78065	7.89475e-237	3.55479e-235
LTC4S	1.71511	0.0782599	-1.63685	3.28041e-230	4.0567e-229
NUSAP1	0.609213	2.60836	1.99915	3.47505e-205	1.78774e-204
AC239804.1	2.12467	0.0208626	-2.10381	1.24999e-237	7.26473e-236
RCBTB2	2.34949	3.94447	1.59498	4.94151e-217	3.32437e-216
BCRP2	2.03216	0.0182458	-2.01391	7.30307e-236	2.61516e-234
PLIN3	2.88133	4.88616	2.00483	2.00433e-177	7.11708e-177
HNRNPUL2-BSCL2	2.27063	0.402861	-1.86777	1.8653e-158	5.50212e-158
CCDC57	4.24368	1.71491	-2.52877	6.12932e-232	9.22238e-231
CD22	3.34957	1.08294	-2.26663	6.949e-156	2.00745e-155
TM2D3	4.94822	2.93291	-2.01532	1.81337e-233	3.85005e-232
AC100786.2	2.72294	0.124374	-2.59856	3.22813e-176	1.13146e-175
PI4KAP1	3.39035	1.44709	-1.94326	2.17123e-198	1.00297e-197
BOLA3	4.59702	2.05191	-2.5451	7.06151e-233	1.2316e-231
SELENOM	6.15448	2.76338	-3.3911	3.71506e-229	4.24236e-228
PLSCR3	2.91466	0.427118	-2.48755	6.33005e-233	1.11688e-231
AC004466.1	2.16458	0.283455	-1.88113	2.0962e-233	4.19956e-232
EEF1A1P9	0.0954206	1.86925	1.77383	1.94029e-238	1.71339e-236
FGD1	1.93943	3.57036	1.63093	6.02424e-237	2.78847e-235
NDUFAF5	3.51902	1.871	-1.64801	2.66525e-233	5.12511e-232
PTTG1IP	5.04494	7.74134	2.6964	3.64444e-232	5.67652e-231
ZNF692	5.13606	3.43092	-1.70514	1.99888e-202	9.82257e-202
THNSL2	2.86522	1.16415	-1.70107	2.17425e-141	5.61256e-141
LAPTM4B	3.45163	6.05196	2.60033	4.36417e-238	3.04171e-236
ZCCHC24	4.59417	6.34296	1.74878	5.343e-157	1.55785e-156
KCNK4	2.07946	0.184528	-1.89493	9.21831e-210	5.23868e-209
PI4KAP2	3.58776	1.18307	-2.4047	1.46228e-231	2.08958e-230
U2AF1L4	4.17132	2.3491	-1.82222	5.49894e-227	5.41295e-226
PRPF6	4.40373	6.56558	2.16185	1.36618e-237	7.81518e-236
GRIN2C	3.64909	2.0377	-1.61139	2.97501e-98	5.84937e-98
SLC1A6	2.99857	1.21645	-1.78212	2.23848e-140	5.73121e-140
RAPGEF3	4.2627	2.06562	-2.19709	4.08901e-181	1.50971e-180
YPEL3	6.96804	5.14325	-1.82479	8.30108e-218	5.70907e-217
NARF	4.93871	3.18704	-1.75168	4.76495e-229	5.40731e-228
MYCBP2	4.83622	3.18363	-1.65259	1.29237e-206	6.86807e-206
ABLIM2	4.07305	2.00339	-2.06966	1.93839e-181	7.1859e-181
IL13RA1	2.26983	4.01223	1.7424	1.20218e-156	3.49455e-156
PPFIA4	4.36621	1.94185	-2.42436	1.62766e-160	4.88996e-160
C17orf49	5.00864	1.18268	-3.82595	1.8005e-233	3.85005e-232
CHCHD10	6.5793	3.78979	-2.78951	1.31788e-222	1.06786e-221
SPON2	2.61691	0.684705	-1.93221	1.34517e-166	4.28772e-166
SLX1B-SULT1A4	2.09948	0.00136016	-2.09812	3.04843e-240	2.9814e-238
PRKCZ	5.92963	2.7422	-3.18743	3.53186e-229	4.0433e-228
SEZ6L	3.26983	5.71961	2.44978	1.10426e-157	3.24098e-157
AL645608.6	0.072964	1.79672	1.72376	8.2529e-249	1.97537e-246
CRISPLD1	1.02398	3.81296	2.78899	1.30489e-228	1.43082e-227
KLF12	1.35298	2.95316	1.60017	3.29383e-229	3.78032e-228
PVALB	3.92909	1.28106	-2.64803	4.3749e-92	8.30209e-92
ACYP2	5.1388	3.43237	-1.70643	1.25221e-221	9.72215e-221
KIAA0930	5.95451	4.32682	-1.62769	1.01674e-136	2.53711e-136
MEMO1	3.45202	1.11706	-2.33495	1.80069e-233	3.85005e-232
APEX1	4.91537	7.0059	2.09053	2.35251e-238	1.99928e-236
LFNG	2.86247	4.97108	2.10861	3.78184e-168	1.22325e-167
AP1G2	5.84345	1.67785	-4.1656	2.25729e-233	4.44879e-232
NUDT11	2.74625	4.54403	1.79777	1.30503e-171	4.36074e-171
RNPS1	6.00661	4.32134	-1.68527	2.20924e-233	4.37488e-232
AC005726.5	1.87543	0.0262815	-1.84914	2.12985e-236	8.51519e-235
NPIPA1	6.69492	1.027	-5.66792	1.85805e-233	3.88502e-232
ABCB9	2.99253	1.07003	-1.9225	1.60426e-226	1.54408e-225
MRPL23	4.95633	3.11812	-1.83821	1.42926e-217	9.74868e-217
CELF4	4.83887	2.46478	-2.3741	2.47393e-147	6.682e-147
THOC3	3.4213	1.5077	-1.9136	2.13965e-223	1.77809e-222
CRTAC1	2.73934	4.36672	1.62738	1.09686e-114	2.37084e-114
AC133550.1	4.32694	0.00142469	-4.32552	8.8716e-241	8.96574e-239
VWA5B2	4.27936	1.57946	-2.6999	1.53496e-203	7.65837e-203
FCF1P2	2.07698	3.84831	1.77133	8.83946e-236	3.10422e-234
LHFPL4	2.8323	4.47896	1.64666	2.57961e-186	1.01155e-185
SYT5	4.4535	2.08549	-2.36801	1.13961e-105	2.3306e-105
LCN12	2.88871	1.06671	-1.82199	2.50082e-194	1.08756e-193
AL162231.1	4.46017	0.819148	-3.64102	1.65972e-231	2.34956e-230
CSF1	2.54544	4.39391	1.84847	4.03622e-175	1.39933e-174
HLA-A	6.05062	7.95001	1.89939	6.22993e-195	2.72359e-194
NEAT1	6.64649	2.68687	-3.95962	2.38006e-230	2.99416e-229
ATF7IP2	2.26289	0.475476	-1.78741	7.46083e-226	6.96e-225
NAIP	2.77697	0.172634	-2.60434	8.39243e-234	2.12924e-232
PTAFR	0.662638	2.45395	1.79131	2.63317e-191	1.10191e-190
LRRN1	2.4298	5.31928	2.88947	1.40782e-221	1.08977e-220
NFIA-AS2	0.517447	2.35627	1.83882	2.99518e-190	1.2327e-189
KLRC2	1.31801	3.19114	1.87313	8.97964e-90	1.6795e-89
NDUFA5	5.79816	3.80507	-1.99309	2.4779e-232	3.95053e-231
NDUFB2	7.04283	4.77091	-2.27192	9.95814e-233	1.70573e-231
SH3GLB2	6.13369	4.25703	-1.87666	4.55537e-222	3.59977e-221
MT-TM	0.000124845	1.86849	1.86836	4.79295e-307	1.47777e-304
BMP2	0.637648	4.24459	3.60695	1.86288e-232	3.02568e-231
LINC02210	3.97471	2.1847	-1.79001	1.95709e-232	3.16739e-231
NPAS2	3.33367	1.40519	-1.92847	3.53456e-215	2.26478e-214
MRPS31P5	2.07957	0.38565	-1.69392	1.55788e-233	3.71909e-232
HLA-DRA	4.29518	7.51127	3.21609	1.32662e-155	3.82388e-155
LINC02193	2.08498	0.0964688	-1.98851	5.47595e-231	7.27102e-230
AC019069.1	0.394469	2.17934	1.78488	3.92984e-224	3.37844e-223
RF01953	1.66725	0	-1.66725	9.72495e-117	2.12833e-116
USP32P2	2.16689	0.0158859	-2.151	5.9213e-233	1.05396e-231
SCD	6.40863	8.5322	2.12357	2.12844e-156	6.18011e-156
NEFM	5.45553	2.51719	-2.93834	1.57528e-125	3.65137e-125
LMNB1	1.39734	3.10572	1.70838	5.71022e-170	1.87398e-169
FTCD	2.62844	0.532629	-2.09581	2.28734e-209	1.28701e-208
SELENOW	8.63983	5.98576	-2.65407	2.44299e-233	4.75299e-232
PPIP5K1	3.58529	1.73096	-1.85433	2.33054e-221	1.79108e-220
WBP1	5.84629	3.74955	-2.09674	5.60084e-231	7.42602e-230
RPL34	9.14444	6.95621	-2.18822	9.18533e-233	1.5823e-231
CXCL16	2.67983	4.8378	2.15798	1.76653e-195	7.79785e-195
ZNRF3	2.00826	0.0749606	-1.9333	8.31852e-235	2.47663e-233
GCHFR	2.73863	0.693527	-2.0451	2.7749e-226	2.64422e-225
VTI1B	5.82828	4.15301	-1.67527	3.14455e-219	2.25829e-218
CHCHD2P2	0.0233363	2.39954	2.37621	0	0
KCNC1	3.65172	1.99521	-1.65651	4.15769e-100	8.25503e-100
ALG1L6P	0.00549561	1.85158	1.84608	0	0
RYR2	2.74094	0.746077	-1.99487	1.54042e-154	4.39421e-154
SYNDIG1L	2.79603	0.528784	-2.26725	8.06752e-127	1.88487e-126
FAM204A	4.15864	2.00739	-2.15125	1.89199e-233	3.91995e-232
CCDC80	2.32644	4.04344	1.71701	3.38111e-141	8.7131e-141
SERPINA3	2.46974	0.610278	-1.85946	4.02274e-88	7.45494e-88
RNASE6	1.33047	3.61469	2.28422	1.25179e-181	4.6548e-181
SPARC	7.39505	10.3816	2.98655	3.04463e-195	1.33844e-194
EVL	6.82296	4.21574	-2.60722	1.80405e-233	3.85005e-232
RNA5SP118	0.0269933	2.07874	2.05174	0	0
PIGL	3.10891	1.41501	-1.6939	9.00833e-233	1.55771e-231
AC005339.1	2.11656	0	-2.11656	7.70738e-239	7.117e-237
IFT20	4.72878	3.06881	-1.65997	5.26766e-232	7.99867e-231
2023-09-04	7.9829	4.57943	-3.40347	1.31342e-221	1.018e-220
MUSTN1	3.28647	0.13229	-3.15418	1.49964e-231	2.13626e-230
IGFBP5	3.39798	5.84972	2.45175	6.63935e-206	3.48059e-205
RPL28	8.37713	6.25115	-2.12598	7.00938e-229	7.85145e-228
PHF11	3.77934	2.02048	-1.75886	2.0521e-191	8.60333e-191
NDUFA7	5.39185	2.02357	-3.36829	5.81488e-233	1.03908e-231
AC083864.2	0.0219551	1.68937	1.66742	3.02328e-282	8.59319e-280
RBM5	5.70797	4.04096	-1.66701	5.39686e-220	3.98111e-219
ATF6	1.96069	3.59723	1.63655	4.31773e-238	3.02092e-236
ASPDH	4.45988	2.21233	-2.24755	8.16095e-205	4.17245e-204
CCZ1B	4.60681	1.16866	-3.43815	1.8006e-233	3.85005e-232
AC034102.4	2.48641	0	-2.48641	5.75785e-246	9.78922e-244
SNCA	5.79174	3.26928	-2.52246	2.98805e-171	9.93341e-171
ACKR3	2.11173	4.52219	2.41046	3.97065e-216	2.60947e-215
ZNF275	2.25522	4.04561	1.79039	6.8938e-236	2.48327e-234
AC115618.2	1.46827	4.1612	2.69293	4.47734e-236	1.6828e-234
RBFOX3	4.85126	1.36387	-3.48739	3.21342e-180	1.17593e-179
YTHDF1	3.63104	5.23377	1.60273	1.0224e-235	3.56976e-234
NR2F1-AS1	4.40558	2.62608	-1.7795	5.84956e-226	5.4822e-225
NPPA	1.56916	3.1559	1.58673	9.4689e-95	1.8239e-94
SRP19	4.63477	2.75206	-1.88271	3.97006e-231	5.36932e-230
PACSIN1	5.62815	3.11187	-2.51628	1.14773e-98	2.26176e-98
HAGHL	4.57142	2.0636	-2.50781	1.182e-227	1.20458e-226
PAM16	4.56813	2.19867	-2.36946	1.69364e-232	2.77558e-231
KCNA1	3.61389	0.960358	-2.65353	1.18835e-173	4.06187e-173
HIST2H2AA4	2.38626	0.00252463	-2.38374	6.18861e-189	2.50561e-188
ATXN3	2.61119	1.00092	-1.61027	2.86296e-234	7.80811e-233
C1QL1	3.52079	7.42248	3.90169	4.27543e-200	2.02221e-199
AC062021.1	0.876904	2.6537	1.77679	9.79072e-55	1.49641e-54
HLA-E	5.65235	7.70095	2.0486	6.27101e-188	2.51158e-187
PDIA2	5.05991	2.35629	-2.70362	1.09588e-184	4.22446e-184
RNU1-4	3.59138	0.00487926	-3.5865	4.53231e-234	1.18971e-232
SOX3	0.519411	2.15002	1.63061	3.85798e-176	1.3504e-175
FOXRED2	2.70064	4.40004	1.6994	5.19425e-232	7.90038e-231
PSMC1P1	2.22664	0.536672	-1.68996	3.77066e-230	4.64401e-229
C9orf24	3.92553	1.13817	-2.78736	2.8762e-184	1.10196e-183
DNASE2	2.8216	5.05461	2.23301	8.38091e-236	2.9546e-234
MDP1	3.76776	2.1336	-1.63416	5.1135e-231	6.80466e-230
FAM153A	3.05374	0.100401	-2.95333	1.28359e-230	1.64551e-229
SH3GL3	4.58156	2.7382	-1.84335	1.50709e-165	4.74561e-165
CNPY2	5.35113	3.42075	-1.93038	8.14357e-231	1.06193e-229
AC015674.1	2.36487	0	-2.36487	1.83932e-221	1.41776e-220
NPIPA3	3.14141	0.307908	-2.8335	2.04166e-232	3.29547e-231
CHN1	6.68411	4.83885	-1.84526	5.02496e-87	9.26131e-87
YBX1	6.11977	8.04382	1.92405	5.48601e-211	3.19143e-210
ANGPTL2	2.41848	6.03657	3.61808	6.56479e-225	5.85106e-224
AL133465.1	0.333061	2.08111	1.74805	9.82412e-140	2.50611e-139
NPEPL1	4.48371	1.69038	-2.79334	4.74987e-231	6.35797e-230
AGT	5.94999	8.59116	2.64117	3.88433e-194	1.68519e-193
DAZAP2P1	0.079859	1.79319	1.71333	1.57318e-236	6.45998e-235
ANKRD36	2.40101	0.719808	-1.6812	1.08416e-228	1.19382e-227
SDHAP1	3.51439	1.82697	-1.68742	3.24266e-230	4.01274e-229
C3AR1	1.20646	3.79982	2.59336	2.71654e-193	1.16274e-192
POFUT1	1.96581	3.97555	2.00973	3.16528e-238	2.3892e-236
KIFC1	0.210999	1.91863	1.70763	1.68555e-216	1.1166e-215
ZFYVE21	5.51525	3.57477	-1.94048	5.66867e-228	5.91956e-227
AC107464.1	2.59506	0.832628	-1.76243	1.47719e-173	5.04158e-173
ARHGDIB	3.5642	5.24336	1.67916	1.0785e-140	2.76751e-140
ANKS1B	4.67684	2.53847	-2.13837	8.80103e-206	4.5966e-205
RHOA	6.33333	8.24049	1.90716	6.58646e-237	3.01041e-235
LINC01106	3.7391	0.211331	-3.52777	2.21867e-230	2.80276e-229
MT-TT	0.000124845	2.60302	2.6029	0	0
MIR3936	0.468728	3.35415	2.88543	1.35252e-201	6.55923e-201
AC008581.1	2.85512	0	-2.85512	5.75797e-246	9.78922e-244
AL031722.1	0.0102426	2.08198	2.07173	0	0
EGR1	3.44283	5.72145	2.27862	3.23052e-108	6.7062e-108
TRMT10C	2.40436	4.01476	1.61041	1.10717e-237	6.56046e-236
TRHDE-AS1	1.90265	0.298364	-1.60429	2.89443e-201	1.39551e-200
ID3	4.19316	7.10144	2.90828	1.31654e-178	4.72278e-178
GNB5	4.07955	2.11315	-1.9664	8.49159e-205	4.33784e-204
CARTPT	2.467	0.524214	-1.94279	5.80333e-90	1.08632e-89
VASH1-AS1	3.7604	1.39603	-2.36437	1.9859e-231	2.77675e-230
TMEM97	1.95287	3.98316	2.03028	2.16779e-232	3.48052e-231
AL590666.2	0.999491	3.4694	2.46991	1.04009e-211	6.173e-211
MIR573	0.000124845	2.32661	2.32648	0	0
ABI3	1.20144	2.8614	1.65996	2.93489e-161	8.87443e-161
RTEL1-TNFRSF6B	2.42179	0.626264	-1.79552	4.42735e-223	3.63931e-222
GNA13	2.87012	4.86465	1.99453	1.16267e-228	1.27641e-227
SLC16A1	3.06741	4.78706	1.71966	4.19061e-167	1.3421e-166
GPR146	2.70491	1.01641	-1.6885	3.03749e-226	2.89142e-225
CCM2	5.46238	3.38527	-2.07712	3.48304e-228	3.69661e-227
LIME1	3.72333	1.9264	-1.79693	1.7753e-211	1.04818e-210
LIPE-AS1	2.38679	0.798496	-1.58829	3.8628e-223	3.18388e-222
MCTP1	2.71847	0.87457	-1.84389	9.73596e-190	3.98082e-189
CTSO	2.44439	5.05572	2.61134	2.03061e-233	4.09975e-232
CMC1	3.65669	1.08051	-2.57618	1.83277e-233	3.85005e-232
ZNF282	2.40885	4.01018	1.60134	7.46619e-235	2.24492e-233
NPM2	4.28949	1.83018	-2.45931	1.25242e-169	4.09613e-169
ETFB	5.77429	3.55067	-2.22362	1.76024e-219	1.27674e-218
PLXDC1	3.32684	1.66152	-1.66532	9.21056e-196	4.08259e-195
PRODH	4.77559	1.25379	-3.5218	2.3296e-224	2.02959e-223
HEPN1	5.4386	0	-5.4386	5.75732e-246	9.78922e-244
SDHC	5.48986	3.42109	-2.06877	3.80541e-231	5.16214e-230
ABCB6	4.38599	2.14055	-2.24544	1.15721e-232	1.96369e-231
AL157935.2	3.12648	0.656622	-2.46985	2.91871e-230	3.63909e-229
RESP18	1.8263	0.202468	-1.62383	3.29309e-160	9.85922e-160
SNCG	6.53785	4.06276	-2.47509	1.01559e-130	2.43825e-130
TOMM6	6.09147	0	-6.09147	5.7517e-246	9.78922e-244
MAPRE1	3.9823	6.73852	2.75622	4.50876e-236	1.69111e-234
LINC01736	1.32628	3.31543	1.98916	1.18758e-128	2.81218e-128
HOPX	5.50004	3.34374	-2.1563	8.51062e-141	2.18698e-140
TNFAIP8L2	0.879717	2.71782	1.8381	2.60715e-195	1.14751e-194
ITM2C	7.56908	9.24752	1.67844	5.28962e-148	1.43682e-147
NOMO2	5.81224	1.65535	-4.15689	1.8002e-233	3.85005e-232
PDZD7	2.59038	0.908071	-1.68231	2.28379e-195	1.00592e-194
TYROBP	3.7286	5.83008	2.10148	2.60578e-129	6.20523e-129
GIMAP5	2.09771	0.370769	-1.72694	7.88619e-227	7.7045e-226
C4B	4.34256	2.22272	-2.11984	1.10544e-139	2.81877e-139
CRYM	4.79605	1.95048	-2.84557	2.36579e-125	5.47464e-125
DIO3OS	2.02499	0.357198	-1.66779	1.65048e-203	8.23025e-203
LINC02609	3.08407	0.758636	-2.32543	3.91306e-215	2.50378e-214
KRT222	2.66678	0.641744	-2.02504	1.91683e-177	6.80904e-177
ATP5MC3	6.60375	4.33656	-2.26719	2.33486e-233	4.58677e-232
TRAPPC5	5.13152	1.24118	-3.89034	9.35127e-232	1.37074e-230
PINK1	6.49736	4.6714	-1.82596	1.15904e-213	7.1666e-213
KIAA0408	3.44182	0.16456	-3.27726	5.48994e-234	1.42261e-232
RELL2	3.58404	1.55579	-2.02825	6.44467e-186	2.51685e-185
EFS	3.49183	5.46411	1.97228	1.31995e-191	5.55429e-191
TBC1D3L	3.28914	0.362212	-2.92693	1.27721e-170	4.21818e-170
AC090114.2	0.995184	2.6268	1.63161	4.57788e-235	1.41626e-233
LAPTM5	3.23154	6.16582	2.93428	3.33547e-180	1.21985e-179
MIR621	0.000124845	3.85803	3.8579	0	0
OLR1	1.69344	3.35065	1.65721	1.37162e-96	2.66914e-96
RABL2B	4.22393	2.2985	-1.92544	2.0282e-231	2.83154e-230
GPR137B	3.73006	5.38386	1.6538	2.16828e-196	9.71985e-196
AL390726.5	3.19827	0.586198	-2.61207	3.99372e-192	1.69032e-191
CELF6	2.75051	0.0426298	-2.70788	2.55415e-236	1.00787e-234
CEMP1	2.70129	0	-2.70129	5.75794e-246	9.78922e-244
LIN7B	4.34403	2.59741	-1.74661	7.82189e-211	4.53291e-210
VSIG4	1.64246	4.74538	3.10292	1.68357e-185	6.53979e-185
AC011472.3	2.47632	0	-2.47632	5.75795e-246	9.78922e-244
LUZP6	3.41271	0	-3.41271	1.26925e-204	6.45844e-204
KBTBD11-OT1	0.599301	2.31525	1.71595	1.91843e-198	8.87767e-198
HDAC10	4.08502	1.60135	-2.48367	1.53547e-230	1.9615e-229
SCRG1	3.40908	5.17168	1.7626	2.51809e-188	1.01297e-187
SOX12	2.35752	4.04879	1.69126	6.88567e-220	5.06294e-219
IAH1	4.57388	2.7004	-1.87348	3.56032e-233	6.62243e-232
AC010336.3	2.98266	0	-2.98266	6.00241e-243	6.82436e-241
MAGED4	2.40199	0.0185978	-2.38339	4.22687e-231	5.69563e-230
C9orf3	3.8888	1.40639	-2.48241	6.90896e-232	1.02849e-230
SYCE1	2.81653	0.376863	-2.43967	8.56251e-220	6.27814e-219
ALDH18A1	2.77297	4.43791	1.66493	2.47745e-237	1.29133e-235
PDGFRA	2.51602	4.84377	2.32775	6.76149e-153	1.90606e-152
TRMU	4.09233	2.45417	-1.63816	4.50574e-231	6.049e-230
TMEM134	4.62969	2.65695	-1.97274	1.42023e-226	1.37131e-225
CBLN3	2.42727	0.6296	-1.79767	2.92352e-143	7.66751e-143
SNORD116-4	0.000124845	2.19526	2.19513	0	0
CLDN10	3.99504	1.78456	-2.21048	1.66502e-148	4.54166e-148
ASS1	4.35972	2.53552	-1.8242	3.20437e-153	9.0626e-153
PFN1	5.99286	7.61166	1.61879	1.55793e-220	1.16483e-219
LGALS3BP	4.47192	6.36816	1.89624	2.30587e-170	7.59344e-170
ITGB1BP1	5.67411	3.16585	-2.50826	1.80033e-233	3.85005e-232
APOC4-APOC2	3.00833	0.328876	-2.67945	1.29255e-217	8.83278e-217
DGCR6	4.54984	2.47478	-2.07506	1.6012e-206	8.49443e-206
RGS14	3.81797	1.23771	-2.58026	6.5506e-114	1.40853e-113
RPL26	9.03228	6.74877	-2.28351	2.41057e-233	4.69493e-232
SCLY	2.50077	0.462802	-2.03797	1.80074e-233	3.85005e-232
LINC01351	1.77724	3.73179	1.95456	4.5521e-187	1.80565e-186
AL445363.3	3.25254	0.00571334	-3.24683	1.26968e-241	1.36667e-239
TMEM123	3.6913	5.41869	1.72739	2.63732e-191	1.10339e-190
TARBP1	4.6134	2.78622	-1.82718	1.35451e-201	6.56715e-201
MEG3	8.41368	2.6482	-5.76549	4.23355e-235	1.31421e-233
HID1	5.03516	2.90579	-2.12937	5.36454e-209	2.98795e-208
ATP5PD	7.04966	5.13599	-1.91368	9.81563e-233	1.6829e-231
NID1	1.38562	3.55954	2.17392	8.59857e-218	5.9092e-217
PKIB	2.84342	1.16333	-1.68009	5.84066e-105	1.19018e-104
AGBL5-IT1	0.509432	2.1411	1.63167	2.96277e-236	1.16086e-234
CDKN2B	0.778135	2.66048	1.88234	1.52549e-176	5.37171e-176
TUBA4A	5.50911	3.43082	-2.07829	3.96498e-131	9.53933e-131
FAM181B	2.83488	5.86767	3.03278	7.40529e-228	7.64961e-227
CERS6-AS1	3.54924	0.00675501	-3.54248	6.46815e-236	2.33921e-234
RGS10	2.67596	4.58457	1.90861	1.07928e-134	2.65493e-134
NNAT	5.69728	3.70402	-1.99325	4.79952e-70	7.99744e-70
AES	8.41673	6.2239	-2.19283	4.96342e-226	4.67095e-225
TLR4	1.78239	3.42356	1.64117	3.19624e-148	8.6975e-148
CYP4F35P	1.82744	0.0867124	-1.74073	1.41247e-208	7.7956e-208
AC009084.2	2.09216	0.387314	-1.70484	3.10091e-209	1.73618e-208
AC025423.2	1.99176	0	-1.99176	6.00232e-243	6.82436e-241
AHSA2P	4.52532	2.93807	-1.58725	1.45366e-203	7.26273e-203
MRNIP	4.41736	2.28474	-2.13262	2.72227e-233	5.21821e-232
ICAM2	3.37791	1.61828	-1.75964	1.57693e-192	6.69608e-192
AC092683.1	4.37337	0.0681921	-4.30518	2.85144e-235	9.18063e-234
CD4	2.06402	3.77985	1.71583	1.11308e-173	3.80816e-173
GOLGA8N	2.15123	0.271147	-1.88008	1.25574e-233	3.06621e-232
VCAN	2.73934	5.22899	2.48965	2.12866e-205	1.09944e-204
AD000671.1	2.02356	0.128388	-1.89517	4.90179e-223	4.02385e-222
MIRLET7D	0.000124845	1.91459	1.91446	0	0
CYB5D1	2.69392	0.925783	-1.76813	2.99472e-233	5.66878e-232
CARD19	4.21506	2.40858	-1.80648	3.94815e-204	1.99336e-203
SLX1A-SULT1A3	3.04113	0.0215555	-3.01958	6.01182e-237	2.78847e-235
FAM153C	3.75696	0.113047	-3.64391	6.82595e-227	6.68664e-226
VILL	2.85268	1.16961	-1.68307	2.25443e-170	7.42673e-170
RRP7BP	3.76275	1.53852	-2.22423	2.97681e-228	3.17602e-227
GP1BB	3.64403	0	-3.64403	1.57683e-191	6.63062e-191
C6orf62	4.79087	6.60105	1.81018	1.37517e-236	5.73554e-235
FJX1	2.50617	4.91522	2.40904	7.57681e-230	9.09168e-229
MIB2	5.14128	2.94951	-2.19177	2.43309e-229	2.80484e-228
PLPP2	3.02927	1.38894	-1.64033	7.43493e-126	1.72621e-125
PILRB	4.02329	1.04072	-2.98258	2.12591e-225	1.93846e-224
FAM106A	2.45588	0.236872	-2.21901	5.74144e-222	4.51156e-221
CARS2	4.26803	2.14058	-2.12745	1.07656e-231	1.5617e-230
A2M	4.69577	7.07129	2.37552	4.42418e-204	2.22875e-203
PDCD6	5.46961	3.69273	-1.77688	1.82523e-233	3.85005e-232
HBA2	7.09455	4.67686	-2.41769	9.5944e-113	2.04777e-112
FDX2	4.60772	2.03115	-2.57657	1.11781e-227	1.14044e-226
TNFRSF25	4.52429	1.3036	-3.22069	1.6131e-220	1.20558e-219
SLC39A6	3.44382	5.52806	2.08424	1.99796e-236	8.05875e-235
CCL3	0.889437	3.42521	2.53577	9.23254e-150	2.54276e-149
FTH1	10.751	8.45277	-2.29823	2.97835e-229	3.4204e-228
GTF2I	4.99166	3.12877	-1.86289	1.15174e-225	1.06298e-224
ZNF273	3.07537	1.42573	-1.64964	6.14401e-218	4.24319e-217
ZDHHC11B	4.28161	2.33975	-1.94187	2.70499e-202	1.32668e-201
PPP1R3E	4.55206	2.58437	-1.96769	6.53029e-232	9.7611e-231
ZFPL1	4.1187	2.39643	-1.72227	2.04034e-230	2.58108e-229
SULT4A1	4.91473	3.03527	-1.87946	2.71993e-75	4.666e-75
MT-TF	0.000124845	3.6106	3.61047	0	0
NPIPB13	1.93277	0.079128	-1.85365	4.12346e-232	6.37839e-231
AL138478.1	3.06647	0	-3.06647	5.75795e-246	9.78922e-244
DSCAML1	1.82253	3.51297	1.69044	1.29951e-150	3.60191e-150
DCLK2	4.07379	6.75645	2.68266	1.63047e-234	4.64889e-233
CSAD	4.41894	2.72954	-1.68939	1.55084e-210	8.94747e-210
KCNN3	1.81007	4.24606	2.436	6.35135e-193	2.70643e-192
TRIM3	4.34414	2.37384	-1.9703	2.70116e-227	2.69243e-226
XAF1	3.37356	0.905012	-2.46855	1.20199e-211	7.12692e-211
TAF1D	5.63034	3.25802	-2.37232	3.29384e-233	6.15809e-232
LIX1	2.5226	4.80607	2.28347	2.96133e-155	8.51826e-155
SLC4A4	3.20681	5.43092	2.22411	1.25242e-169	4.09613e-169
GOLGA2P7	2.90471	0.363976	-2.54073	1.75673e-233	3.85005e-232
AC093484.3	5.09563	0	-5.09563	8.00827e-242	8.67194e-240
ACADVL	7.50205	5.78614	-1.71591	1.69495e-221	1.3098e-220
WLS	4.07503	6.25029	2.17526	1.91897e-184	7.36612e-184
SIGLEC10	1.12384	2.8987	1.77486	2.11967e-169	6.92385e-169
RPL17	8.68144	3.93631	-4.74512	1.75793e-233	3.85005e-232
SNCB	6.62094	4.60021	-2.02072	6.93371e-76	1.19488e-75
SLC7A10	2.57017	0.812058	-1.75811	3.26157e-136	8.1109e-136
ST18	3.05482	1.02057	-2.03424	1.94301e-157	5.68617e-157
AC068385.1	4.07948	0	-4.07948	5.21601e-225	4.67423e-224
NPIPA9	7.39646	0.0350919	-7.36137	3.48849e-236	1.34163e-234
BBOX1	2.99474	4.65855	1.66381	5.68176e-133	1.38307e-132
MAL2	3.19598	1.43997	-1.75601	1.12955e-95	2.18779e-95
THOC1	4.17691	2.35132	-1.82558	1.35321e-229	1.59846e-228
GAD2	3.13922	1.48609	-1.65313	1.79579e-82	3.22098e-82
PRPF40B	3.60245	1.56578	-2.03667	1.81989e-233	3.85005e-232
AMOTL2	3.03297	4.7501	1.71712	2.1077e-171	7.02218e-171
AL355140.1	1.6167	0	-1.6167	1.91671e-174	6.60357e-174
APOE	8.62338	10.7858	2.16242	2.18865e-165	6.87986e-165
C15orf39	1.22798	2.83963	1.61165	3.66036e-224	3.15721e-223
FKBP1B	4.48556	1.74593	-2.73963	1.48806e-211	8.81163e-211
ZSCAN18	5.70057	3.65147	-2.04909	5.13743e-233	9.26214e-232
RNU1-1	3.58609	0.0400643	-3.54603	4.97274e-227	4.90559e-226
MYCL	0.618401	2.33259	1.71419	1.39662e-220	1.04853e-219
UBE2V1	5.21934	1.63219	-3.58715	1.80035e-233	3.85005e-232
CHMP1B-AS1	2.33226	0	-2.33226	5.47944e-237	2.58229e-235
PPP1R16A	4.66046	2.7214	-1.93906	9.67897e-219	6.84832e-218
KLF15	3.19108	4.98	1.78892	5.09162e-166	1.61221e-165
STRC	2.73881	0.0238456	-2.71496	2.92919e-237	1.49677e-235
FAR2P2	3.49321	0.420816	-3.07239	9.29919e-233	1.59888e-231
MMP17	4.00339	2.3527	-1.65069	1.92232e-89	3.58987e-89
MIR570	0.000124845	2.3169	2.31677	0	0
MT3	9.82835	7.87161	-1.95674	1.42338e-155	4.10149e-155
TMSB4XP8	1.52545	3.76737	2.24193	1.35357e-120	3.03572e-120
MLXIPL	3.40929	1.71843	-1.69085	8.41212e-143	2.19642e-142
IQSEC3	4.76061	2.10414	-2.65646	6.55558e-180	2.38601e-179
KIFC2	5.80621	3.37138	-2.43483	2.08329e-179	7.54321e-179
MIR3685	0.000124845	3.11046	3.11033	0	0
DCN	4.32858	2.53418	-1.79439	1.12355e-152	3.1609e-152
SNORA33	0.260345	2.2757	2.01536	6.51335e-235	1.97474e-233
CLK3	4.52408	1.91644	-2.60764	1.80067e-233	3.85005e-232
APLNR	2.82175	5.06929	2.24754	2.29158e-99	4.5306e-99
CUL9	4.70658	2.78313	-1.92344	9.66852e-238	5.90201e-236
MPV17	5.43853	3.84051	-1.59802	2.37945e-233	4.64926e-232
LIFR	2.53927	4.64936	2.11009	2.86788e-205	1.47706e-204
TWNK	1.38125	3.11778	1.73653	1.30857e-235	4.47447e-234
RPL13AP25	0.194945	2.62603	2.43109	1.87022e-239	1.78122e-237
IL17RD	1.2692	3.37978	2.11058	6.35263e-233	1.11977e-231
ETS1	2.01699	3.65404	1.63705	2.24247e-172	7.55563e-172
ACYP1	4.10376	2.29513	-1.80863	3.71373e-231	5.04153e-230
PLTP	4.74425	7.11864	2.37439	5.7809e-196	2.57367e-195
HMOX1	2.26157	4.22576	1.96418	5.17346e-147	1.39443e-146
KLHL3	2.65994	1.0569	-1.60304	6.42812e-213	3.9187e-212
AMOTL1	1.77893	3.37098	1.59204	3.94961e-225	3.55152e-224
STK24	3.97557	2.09647	-1.87909	7.1564e-232	1.06271e-230
PIGT	4.00194	5.60466	1.60272	1.23716e-230	1.5871e-229
NR4A1	4.32427	2.71738	-1.60689	1.67433e-103	3.3808e-103
PKD1	6.31019	3.48081	-2.82938	5.73753e-220	4.22728e-219
CHST9	0.534192	2.43022	1.89602	9.99092e-173	3.38067e-172
PSMG4	3.43595	1.25227	-2.18368	1.8328e-233	3.85005e-232
AL355916.2	0.574807	2.6951	2.1203	7.03991e-155	2.01706e-154
RBBP9	1.87399	3.58959	1.7156	1.4569e-237	8.2051e-236
AF127577.1	2.83112	0	-2.83112	1.87268e-244	2.43331e-242
ITIH4	2.30305	0.157889	-2.14516	1.19725e-233	2.93125e-232
RUNDC3A	7.12762	5.0266	-2.10102	2.42114e-184	9.28784e-184
RASA4	4.22969	0.48963	-3.74006	1.76294e-233	3.85005e-232
TRAPPC12	5.03105	3.35194	-1.67911	2.37557e-232	3.79736e-231
BCRP3	2.55987	0.60652	-1.95335	2.35335e-220	1.75163e-219
RSRP1	5.70367	3.10559	-2.59807	4.68863e-232	7.17936e-231
AL450306.1	2.24003	0.360533	-1.8795	4.33701e-224	3.72319e-223
RASGRP2	3.8296	2.02792	-1.80168	3.61377e-219	2.58709e-218
CCPG1	4.27532	1.75998	-2.51534	1.16542e-232	1.9756e-231
CCZ1	4.42508	1.24668	-3.1784	1.80065e-233	3.85005e-232
EEPD1	2.72644	4.46037	1.73393	3.01794e-143	7.91174e-143
RNU6-529P	0.00416441	4.60762	4.60346	0	0
EIF3CL	4.04578	0.0814356	-3.96434	1.62482e-234	4.64006e-233
FAM110B	2.89321	4.67847	1.78525	7.59566e-168	2.4503e-167
RABGEF1	3.31003	1.60902	-1.70101	4.48763e-232	6.8948e-231
UROS	5.16604	3.16771	-1.99833	2.80213e-217	1.89775e-216
COX20	4.84174	2.22574	-2.61601	1.33721e-232	2.22758e-231
RNU6-516P	0.00804311	2.61278	2.60474	0	0
EPN1	5.70126	3.54345	-2.15781	6.31274e-230	7.61506e-229
KRTCAP2	5.67375	2.48819	-3.18556	2.02298e-233	4.09345e-232
ABTB1	4.97776	2.55098	-2.42678	1.06284e-224	9.37637e-224
MSTO1	3.73088	1.8972	-1.83368	4.10948e-232	6.36217e-231
GOLGA8A	4.9972	2.93136	-2.06584	9.71275e-170	3.18179e-169
NTPCR	4.33578	2.5428	-1.79298	5.4275e-228	5.67424e-227
GJB6	3.72613	1.69368	-2.03245	1.84838e-93	3.53601e-93
SOX8	4.24966	7.78598	3.53632	7.88316e-198	3.60761e-197
AGAP3	6.90766	4.31833	-2.58933	5.27899e-233	9.49853e-232
PGAM2	3.28996	0	-3.28996	5.75802e-246	9.78922e-244
HSD17B1P1	0.434098	2.35068	1.91658	1.29141e-236	5.42541e-235
MIA2	2.71774	0.452784	-2.26496	1.01047e-231	1.47405e-230
SNORD63B	0.000124845	2.02901	2.02888	0	0
MCF2L	5.77401	2.49237	-3.28164	3.38693e-238	2.48434e-236
SMIM11A	2.50027	0.00615915	-2.49411	1.77935e-237	9.83836e-236
MIF	7.21485	4.8027	-2.41215	1.48124e-231	2.11335e-230
SRGN	4.145	5.78015	1.63515	7.52725e-104	1.52413e-103
LIN37	3.31759	1.72234	-1.59525	4.90255e-231	6.54308e-230
AC093724.1	0.378631	1.96557	1.58694	1.84945e-212	1.11549e-211
CDK3	2.11487	0.479131	-1.63574	2.29256e-208	1.25804e-207
AC020978.5	1.69654	0	-1.69654	5.75801e-246	9.78922e-244
TMEM191C	2.18666	0.108656	-2.078	4.06426e-234	1.08565e-232
AP001324.1	1.49366	3.84903	2.35537	1.87758e-210	1.0812e-209
ZDHHC22	3.06312	5.36545	2.30233	3.86629e-164	1.20369e-163
RBFOX1	4.03763	1.63303	-2.4046	1.3514e-138	3.41863e-138
SHD	2.26692	5.44696	3.18003	1.96528e-168	6.37036e-168
OLFM1	6.86916	5.06212	-1.80704	9.87304e-100	1.95665e-99
SLC51B	0.340623	2.08073	1.7401	1.66584e-214	1.05147e-213
PLEKHH1	5.29519	3.39898	-1.8962	5.36754e-152	1.50217e-151
EDNRA	0.779029	2.64303	1.864	8.93236e-210	5.07777e-209
RNU1-27P	3.59138	0.0179668	-3.57341	4.44014e-231	5.96533e-230
AC124068.1	4.19942	0	-4.19942	5.75775e-246	9.78922e-244
SMYD3	3.30075	1.44872	-1.85203	2.19517e-227	2.19892e-226
AL023284.4	4.10399	2.4316	-1.67239	2.45515e-136	6.11133e-136
ASCL1	2.24135	5.27463	3.03328	2.03318e-219	1.46943e-218
SMN1	3.64011	1.33261	-2.3075	1.80706e-233	3.85005e-232
PSMC1	5.17703	1.94915	-3.22788	1.80033e-233	3.85005e-232
GTF2H4	3.48178	1.63715	-1.84462	2.94566e-232	4.64338e-231
WASH7P	2.93663	1.21686	-1.71977	1.40491e-224	1.23403e-223
ARHGAP31	1.53433	4.26308	2.72876	2.59502e-237	1.3449e-235
CHKB	4.93571	1.34686	-3.58885	1.80062e-233	3.85005e-232
PICK1	4.2122	2.35106	-1.86113	1.13749e-208	6.28557e-208
LINC00869	3.58538	1.3187	-2.26667	2.06672e-233	4.15423e-232
AC016026.1	3.78758	0.0234571	-3.76413	6.20377e-237	2.85703e-235
TNR	3.19871	6.03791	2.8392	4.55238e-176	1.59224e-175
TRIM17	2.75768	1.05011	-1.70757	3.50284e-135	8.65058e-135
OGFOD2	2.64522	0.640218	-2.005	2.52772e-233	4.89168e-232
SNHG14	6.00078	2.3399	-3.66088	2.29497e-238	1.99795e-236
NDUFS7	6.14627	3.74102	-2.40526	3.13826e-230	3.88619e-229
ADAM33	2.46333	0.789195	-1.67413	1.56872e-181	5.82378e-181
ANKRD39	3.34369	1.73271	-1.61098	1.80455e-230	2.29557e-229
MSH5-SAPCD1	1.89217	0.303794	-1.58837	1.71989e-228	1.86673e-227
VMA21	2.97132	4.66363	1.69231	4.25659e-238	3.01291e-236
AL008729.2	4.98926	0.0928186	-4.89644	2.53054e-235	8.17638e-234
UCHL3	3.52294	1.79835	-1.72458	1.68621e-231	2.38336e-230
CBWD6	3.38539	0.315022	-3.07037	1.77547e-233	3.85005e-232
CD53	2.64318	4.33718	1.69401	1.7162e-117	3.77274e-117
HLA-C	5.68168	7.70964	2.02796	5.38372e-180	1.96184e-179
NXPH1	2.42059	4.05685	1.63627	6.28252e-114	1.35137e-113
AL669942.1	1.67588	0.00479301	-1.67109	1.15994e-237	6.82862e-236
DBNDD1	4.34663	2.75453	-1.5921	1.6256e-144	4.30065e-144
MPPE1	3.97258	1.79482	-2.17776	1.96005e-233	3.99736e-232
WASF2	3.28617	5.07449	1.78832	3.11645e-209	1.74381e-208
RHOB	6.43047	8.74478	2.31431	9.97171e-223	8.09801e-222
FAM226B	2.00528	0.000560106	-2.00472	3.01935e-244	3.89539e-242
C6orf47	2.27792	3.93458	1.65665	2.37892e-238	1.99928e-236
GPC2	0.948711	2.73464	1.78593	3.50838e-210	2.01137e-209
MAP3K12	4.51157	2.90465	-1.60692	2.37461e-207	1.27952e-206
LRRC7	2.75868	0.821285	-1.93739	1.48882e-141	3.85086e-141
ZBTB5	1.59575	3.22887	1.63313	1.7168e-235	5.75144e-234
CYP46A1	4.67877	2.30258	-2.37619	3.46052e-163	1.06533e-162
MALAT1	6.65544	4.42283	-2.23261	4.12622e-204	2.08211e-203
MARCKS	4.71583	8.35516	3.63932	1.42711e-236	5.91358e-235
COMMD3-BMI1	2.46206	0.0295412	-2.43252	2.02223e-234	5.62483e-233
CPLX2	6.59183	4.38795	-2.20387	2.99562e-91	5.65517e-91
BCAN	5.62274	10.0385	4.41574	6.06296e-224	5.16104e-223
MRPS24	5.43827	2.31283	-3.12544	1.9321e-233	3.98489e-232
DCX	0.729877	3.2178	2.48793	7.0887e-189	2.86684e-188
SFTPC	2.67733	0.895509	-1.78182	1.9097e-191	8.01738e-191
FUNDC2	5.47502	3.39986	-2.07516	2.24883e-233	4.43693e-232
C6orf89	3.51574	5.19425	1.67851	4.45845e-238	3.08379e-236
RIN1	3.12645	1.24678	-1.87968	4.88011e-161	1.47221e-160
ALKBH6	3.76221	0.873174	-2.88903	1.80706e-233	3.85005e-232
MTCL1	3.11971	1.39861	-1.7211	4.47058e-135	1.10315e-134
AL355472.3	2.30835	0.389065	-1.91929	9.02277e-196	4.00032e-195
FAM221A	3.06824	1.11337	-1.95487	4.33502e-231	5.83272e-230
CMC4	2.75232	0.0010983	-2.75122	1.00043e-244	1.42179e-242
ITGA9-AS1	2.69412	0.792834	-1.90129	2.09269e-232	3.36886e-231
APLN	2.56686	4.40247	1.83561	1.69093e-161	5.12407e-161
TUBB	6.19983	7.86511	1.66528	1.17447e-219	8.57333e-219
PAAF1	4.85182	3.25153	-1.6003	2.65552e-219	1.91162e-218
SURF4	4.08949	5.98371	1.89422	7.13957e-238	4.57309e-236
ACY1	2.89415	1.17407	-1.72008	1.24811e-231	1.79339e-230
TXNIP	4.89884	7.19567	2.29684	2.10298e-195	9.27626e-195
SLC6A12	3.41232	1.61271	-1.79962	3.1847e-193	1.36184e-192
SMG9	4.5026	2.90968	-1.59292	3.14891e-227	3.12845e-226
APBB1IP	1.37581	3.13156	1.75575	4.43328e-146	1.18719e-145
RPL32P29	3.45564	0	-3.45564	5.75794e-246	9.78922e-244
LINC01123	2.29492	0.177093	-2.11783	1.62988e-208	8.96289e-208
GOLIM4	3.40389	6.00004	2.59615	9.72686e-231	1.25669e-229
HAPLN4	2.20825	0.00161673	-2.20663	7.07639e-239	6.60136e-237
PSMA6	5.2712	2.34375	-2.92744	1.80038e-233	3.85005e-232
VANGL2	2.12534	5.1756	3.05026	2.84278e-234	7.76471e-233
PANX1	1.48105	3.30829	1.82724	1.84977e-232	3.00707e-231
NCAM2	2.50431	4.17409	1.66978	6.51886e-190	2.67323e-189
DEXI	4.70747	2.98081	-1.72666	1.50062e-228	1.63656e-227
SPEG	4.21472	2.38657	-1.82815	6.1937e-209	3.4445e-208
AP3S1	5.39937	3.81134	-1.58803	6.291e-230	7.59387e-229
MICAL2	4.77926	1.42011	-3.35915	3.54403e-191	1.47798e-190
MT1G	5.56361	3.19494	-2.36867	1.9381e-106	3.98283e-106
AP001000.1	0.902549	3.50323	2.60068	8.29206e-236	2.92895e-234
MPEG1	0.542096	2.26746	1.72536	1.1048e-209	6.26416e-209
C1QC	3.37949	7.19114	3.81166	1.75417e-203	8.74248e-203
RPL21P16	7.92276	2.78602	-5.13674	1.93633e-233	3.98701e-232
NAA10	5.49789	3.24043	-2.25745	1.20454e-231	1.73353e-230
CX3CR1	1.41495	4.25662	2.84166	5.02986e-173	1.70674e-172
NXT2	1.49592	3.12379	1.62787	5.71608e-219	4.0729e-218
AC026464.4	4.15111	0.0417769	-4.10934	1.96525e-236	7.94442e-235
GALNT1	2.74335	4.43067	1.68732	1.54789e-237	8.69062e-236
SH3RF3	1.19646	3.09595	1.89949	1.37086e-234	3.95203e-233
CYB5A	4.33314	2.10695	-2.22619	1.8007e-233	3.85005e-232
RPL41P2	3.09341	1.30091	-1.7925	5.81452e-206	3.0517e-205
CMKLR1	0.598254	2.23478	1.63653	5.13094e-214	3.19975e-213
LRRN3	2.44225	4.24482	1.80257	3.64063e-209	2.03337e-208
PSAT1	5.09235	7.59607	2.50373	7.643e-207	4.08083e-206
CDH2	3.17274	5.27133	2.09859	2.37607e-231	3.29444e-230
SPARCL1	7.93142	10.4615	2.53012	3.75352e-184	1.43597e-183
MT-TL1	0.000124845	3.14073	3.14061	0	0
CD74	6.09506	8.05125	1.95619	1.06157e-95	2.05678e-95
OLFM2	5.43548	7.09843	1.66295	1.00167e-143	2.63888e-143
CCDC88B	3.67283	1.97659	-1.69624	5.23341e-175	1.81232e-174
PAK6	2.82728	0.185615	-2.64167	1.82204e-219	1.32051e-218
MORN1	2.41448	0.781933	-1.63255	2.46817e-222	1.97096e-221
AC021188.1	0.450417	2.10346	1.65304	1.04426e-225	9.65248e-225
PLLP	4.90156	2.92704	-1.97453	3.75172e-136	9.32598e-136
CNN3	5.67315	7.59512	1.92197	9.97239e-181	3.66629e-180
FOLR2	1.39275	4.24964	2.85689	3.38425e-205	1.74152e-204
AC005786.3	2.31982	0	-2.31982	1.27544e-203	6.38281e-203
ODC1	3.65494	5.80017	2.14523	6.78477e-229	7.61863e-228
SDHAP3	1.33227	2.92292	1.59065	8.6495e-223	7.04626e-222
SLC2A11	3.78329	1.81376	-1.96953	5.48684e-233	9.8433e-232
AC005523.2	2.68167	0	-2.68167	5.75773e-246	9.78922e-244
GLIPR2	2.81301	4.81168	1.99867	1.19855e-196	5.38875e-196
SEM1	5.41503	2.82224	-2.59279	7.1052e-232	1.05597e-230
DNAJC25-GNG10	2.79257	0.00158736	-2.79098	4.23645e-241	4.3787e-239
AC146944.4	2.79593	0.0533665	-2.74256	1.18743e-236	5.09446e-235
NOTCH1	2.19856	5.09139	2.89283	7.31116e-234	1.86532e-232
LINC00836	0.62815	2.23371	1.60556	3.3712e-119	7.49701e-119
ZC3H14	3.69837	1.94501	-1.75336	1.807e-233	3.85005e-232
SLX1A	3.55031	0.0128786	-3.53743	1.1921e-237	6.95049e-236
CACNA1A	4.65744	2.62096	-2.03648	3.86978e-157	1.12958e-156
AC005944.1	5.40557	0	-5.40557	3.28918e-245	4.86538e-243
LAMA5	4.75672	2.84904	-1.90768	6.91697e-183	2.60781e-182
PFDN5	8.19886	6.42601	-1.77284	9.43188e-233	1.61864e-231
PTRH1	2.83562	0.083024	-2.7526	4.13673e-234	1.10177e-232
MEX3A	0.469849	3.36146	2.89161	5.37471e-234	1.39673e-232
AP003064.1	2.61537	0	-2.61537	5.48206e-199	2.55572e-198
AC120036.3	0.997112	2.70415	1.70704	3.09307e-198	1.42662e-197
AC105052.3	3.16643	0.155338	-3.0111	7.79287e-222	6.08935e-221
FAM86B1	2.86352	0.428062	-2.43546	2.39735e-233	4.67921e-232
MT-ATP8	14.7621	12.3236	-2.43852	5.25886e-252	1.31047e-249
TOX	1.64376	3.77835	2.13459	6.8317e-184	2.60645e-183
RAB31	4.56336	6.9982	2.43484	4.37643e-214	2.7358e-213
NDUFV2	5.72202	2.24473	-3.47729	1.79977e-233	3.85005e-232
ID1	4.21519	6.1677	1.95251	1.72307e-144	4.55786e-144
S100A1	7.26055	4.16594	-3.09462	7.01854e-153	1.97791e-152
PPP1R15B	2.52568	4.29628	1.7706	2.07324e-237	1.10599e-235
MROH7	1.9418	0.149451	-1.79235	7.10733e-234	1.81842e-232
LIX1L	2.57143	4.95929	2.38786	4.52303e-237	2.18245e-235
TSPAN6	2.31843	4.13531	1.81688	2.86519e-202	1.40449e-201
DLL3	1.83579	6.48498	4.64919	1.14148e-207	6.18362e-207
CYTOR	2.52436	0.678118	-1.84624	2.64203e-152	7.40655e-152
AC138207.2	0.544052	2.21285	1.6688	2.90011e-235	9.27878e-234
TAF7	4.71727	6.44919	1.73191	4.57081e-237	2.19967e-235
CA11	7.14713	5.49614	-1.65099	3.12211e-109	6.51983e-109
SEMA4D	4.72582	2.90514	-1.82068	5.23893e-172	1.75898e-171
RNA5SP283	0.0422292	2.39709	2.35486	0	0
POP4	4.38074	2.38292	-1.99783	5.36216e-233	9.62913e-232
SYNGR3	5.04673	2.54908	-2.49766	5.50688e-152	1.54045e-151
PCDHB9	0.588679	2.61374	2.02506	2.54033e-231	3.51149e-230
NEDD8	6.74072	4.41428	-2.32644	1.94209e-233	3.98701e-232
FGFBP3	1.59004	3.59825	2.00821	5.33375e-212	3.1791e-211
CCN2	2.5274	5.36793	2.84053	6.05762e-197	2.73843e-196
AL157871.1	3.89744	0	-3.89744	2.52611e-243	2.92691e-241
EEF2	7.89415	9.97977	2.08563	2.10965e-235	6.91471e-234
AL732372.2	3.11253	0.106019	-3.00651	4.31591e-234	1.14114e-232
FLRT1	1.64811	3.32625	1.67814	6.83243e-188	2.73402e-187
PHLDB1	5.77398	3.50681	-2.26717	1.10408e-224	9.73074e-224
VSNL1	6.12816	3.54637	-2.58179	2.04359e-78	3.57898e-78
AL354892.2	0.37871	3.13723	2.75852	1.19749e-238	1.08918e-236
C2orf74	4.86758	2.32928	-2.53831	8.2766e-233	1.43527e-231
TEAD1	1.99715	3.96191	1.96476	2.78854e-230	3.48395e-229
SRPX	1.90768	4.81179	2.90412	5.70597e-198	2.61784e-197
RAB29	2.46306	4.19124	1.72818	3.33377e-224	2.8851e-223
SELENON	4.15156	5.92059	1.76903	5.92961e-233	1.0544e-231
RIMS2	3.63525	1.56373	-2.07153	4.62924e-166	1.46632e-165
ANKRD36B	2.05263	0.396254	-1.65638	1.26583e-231	1.81455e-230
MIR635	0.000124845	2.45549	2.45536	0	0
AC090498.1	8.50428	4.5401	-3.96418	1.77631e-233	3.85005e-232
HAPLN1	0.590348	2.32661	1.73626	1.09745e-144	2.90721e-144
TPGS1	2.96879	1.22634	-1.74245	3.96689e-202	1.9414e-201
COL7A1	3.73397	1.62943	-2.10454	1.1389e-203	5.70421e-203
PLGLB1	3.17699	0.172215	-3.00477	8.91218e-234	2.25169e-232
AC008764.2	1.228	3.26649	2.03849	7.81995e-224	6.61333e-223
SLC7A5	4.37337	6.233	1.85964	1.1261e-208	6.22454e-208
SARNP	4.98177	1.00703	-3.97474	1.80053e-233	3.85005e-232
HLA-DRB5	1.69427	4.82361	3.12934	3.72216e-165	1.16801e-164
PIN1	6.36126	4.35081	-2.01045	1.0203e-227	1.04506e-226
SULT1A1	4.15452	1.09697	-3.05755	1.73131e-231	2.43386e-230
AC009084.3	3.47923	0	-3.47923	3.28972e-245	4.86538e-243
CPNE3	2.9245	4.65762	1.73312	6.5976e-229	7.41761e-228
LINC01094	1.71685	3.58282	1.86597	3.21609e-139	8.16864e-139
CNBP	6.46718	8.11583	1.64864	4.1802e-237	2.05519e-235
CMAHP	2.32134	0.701508	-1.61983	6.41607e-195	2.80362e-194
NES	2.88647	7.14498	4.25851	2.75604e-233	5.27183e-232
ABCA7	3.20713	1.2927	-1.91443	3.14965e-215	2.02029e-214
SNORD104	0.000124845	3.64389	3.64376	0	0
RPN2	4.3008	6.70241	2.40161	3.21624e-238	2.41763e-236
WASH6P	4.40108	1.62297	-2.7781	1.435e-232	2.37094e-231
AC011511.4	2.2368	0.00719552	-2.2296	5.26298e-238	3.59253e-236
AC025259.1	2.446	0.00163995	-2.44436	1.99888e-241	2.10182e-239
PID1	2.97456	5.23603	2.26147	7.77041e-185	2.99855e-184
WDR27	3.32556	1.57473	-1.75083	9.12443e-232	1.34181e-230
NUTM2B-AS1	2.7531	0.683748	-2.06935	1.17974e-231	1.70194e-230
SEMA5A	1.44348	3.89208	2.4486	5.03696e-216	3.30426e-215
SELL	1.07935	4.34806	3.26871	3.23708e-186	1.26827e-185
BRINP2	2.67126	4.53536	1.8641	2.81728e-146	7.55888e-146
PINLYP	2.80643	0.838644	-1.96779	5.91371e-198	2.7111e-197
TMEM255A	1.85071	3.71708	1.86638	1.45641e-152	4.0923e-152
AC135506.1	0.301452	2.27908	1.97763	2.02188e-237	1.08176e-235
EEF1D	7.01046	4.09401	-2.91646	2.04842e-233	4.122e-232
CEP95	4.01848	2.36882	-1.64967	3.72422e-224	3.21077e-223
ACAA2	4.34411	2.75499	-1.58912	3.54234e-141	9.1273e-141
HARS	5.26962	3.65691	-1.61271	3.9715e-233	7.26816e-232
NPIPB4	4.36905	0.349003	-4.02004	1.66608e-233	3.85005e-232
DUS1L	5.04988	3.33316	-1.71672	9.31547e-224	7.85618e-223
LAT	2.71053	0.139652	-2.57088	5.56829e-234	1.44087e-232
CCDC50	2.47068	4.05615	1.58547	1.49843e-227	1.51265e-226
OLMALINC	1.80827	3.4726	1.66433	3.74849e-188	1.50527e-187
RNA5SP508	0.0420968	1.76092	1.71883	2.14495e-303	6.50314e-301
AC144530.1	0.162266	1.95036	1.7881	1.62898e-238	1.46697e-236
LUC7L	5.71126	4.11937	-1.59189	1.17906e-219	8.60338e-219
AL121820.2	3.18475	1.37109	-1.81366	3.35981e-145	8.93543e-145
NRXN3	3.72508	1.46515	-2.25993	1.41184e-174	4.86968e-174
AC138866.1	2.52789	0.0721622	-2.45573	2.64143e-229	3.04308e-228
HMGN4	3.43776	5.39273	1.95497	1.53242e-235	5.17184e-234
PEA15	8.06596	10.3361	2.27017	2.64142e-225	2.39293e-224
GOLM1	4.88458	7.17984	2.29526	2.0864e-235	6.86322e-234
CATSPER2	2.886	0.718635	-2.16736	1.20304e-232	2.02073e-231
RNPC3	3.43615	1.77231	-1.66384	3.59455e-221	2.74051e-220
NKD1	1.23702	3.06697	1.82995	4.27124e-202	2.08641e-201
NKAIN4	4.09438	6.67039	2.57601	1.33694e-171	4.46654e-171
CCL4	0.835682	2.83909	2.00341	1.47776e-126	3.44684e-126
VAMP8	2.4583	4.10242	1.64412	1.95661e-139	4.97799e-139
CPLX3	2.23562	0.000910125	-2.23471	9.33353e-244	1.17907e-241
SPACA6	3.7935	1.6815	-2.112	9.45993e-222	7.36983e-221
BRF1	4.02774	1.99656	-2.03118	2.08872e-233	4.19381e-232
CHN2	3.75426	1.42932	-2.32494	2.5287e-209	1.41974e-208
POLB	4.31258	2.53471	-1.77788	2.48269e-232	3.95469e-231
STRADA	4.33549	2.12621	-2.20928	1.90532e-233	3.94308e-232
MTND1P23	4.66426	2.24296	-2.4213	7.64644e-172	2.56399e-171
A1BG	3.68184	0.251009	-3.43083	1.28723e-233	3.13886e-232
MYT1L	3.56165	1.54556	-2.01609	1.21524e-130	2.91526e-130
MCM3	2.81728	4.48168	1.6644	4.44318e-237	2.15536e-235
GATD3A	3.32355	0.56622	-2.75733	5.87013e-226	5.49864e-225
CHCHD7	4.01008	2.37272	-1.63736	8.36918e-229	9.31725e-228
ZNF83	4.66894	2.66526	-2.00369	1.94292e-214	1.22381e-213
ZNF814	3.16756	1.37828	-1.78928	6.60386e-233	1.1605e-231
RPL12P16	2.0158	0	-2.0158	5.75796e-246	9.78922e-244
IRF9	4.97711	1.79895	-3.17815	2.44365e-232	3.89934e-231
DDX39B	6.50683	4.04716	-2.45967	1.97239e-233	4.0179e-232
RNU6-277P	0.000124845	1.6554	1.65528	0	0
AL732372.3	2.12312	0.00149802	-2.12162	1.5244e-240	1.51532e-238
CDK11A	4.2989	1.33867	-2.96024	2.13355e-233	4.2646e-232
IKBKG	3.31582	1.65198	-1.66385	2.72081e-230	3.404e-229
MMP24OS	5.34963	3.43821	-1.91142	1.01425e-228	1.11909e-227
RPL13AP20	0.143022	1.89523	1.75221	8.55479e-240	8.27767e-238
TNXB	3.06307	1.34246	-1.7206	1.39987e-205	7.27157e-205
PLEKHA1	3.56763	1.33307	-2.23456	6.07461e-231	8.02492e-230
SLC39A14	2.30852	3.94336	1.63485	2.21335e-179	8.00935e-179
PHLDA1	2.63371	5.70271	3.069	1.59426e-224	1.39698e-223
AP003419.1	2.81291	0.00108229	-2.81183	1.70154e-238	1.52476e-236
AC008738.3	2.45875	0	-2.45875	3.28974e-245	4.86538e-243
UBR4	5.42274	3.38615	-2.0366	2.56307e-233	4.95481e-232
SAPCD2	1.90475	4.09674	2.19199	6.83727e-171	2.26345e-170
LINC00893	2.34339	0.280419	-2.06297	2.98952e-233	5.66483e-232
OPHN1	2.14524	4.13317	1.98793	2.18761e-189	8.90864e-189
FABP5P7	4.575	0.231693	-4.3433	4.39856e-234	1.15795e-232
TNFRSF21	3.25697	6.04735	2.79038	1.15483e-213	7.14299e-213
RAP2A	3.61966	5.88637	2.26671	1.7453e-222	1.40544e-221
PLEKHG5	3.61941	2.01403	-1.60538	3.60266e-114	7.76309e-114
RND2	3.86985	6.58713	2.71728	1.95911e-201	9.47572e-201
AL139317.3	1.82403	0	-1.82403	1.06213e-243	1.3234e-241
RAB14	4.19861	5.82219	1.62358	6.88943e-238	4.42847e-236
MT-TC	0.000124845	3.34899	3.34886	0	0
MTX1P1	0.111027	2.66683	2.5558	3.26081e-247	7.60479e-245
ANTXR1	2.94163	5.29656	2.35493	3.0786e-224	2.66934e-223
SYNE1	5.20343	2.37612	-2.82731	3.32928e-233	6.21795e-232
TBCD	5.23194	3.51253	-1.7194	1.17547e-231	1.69841e-230
ALCAM	3.62234	5.39697	1.77463	1.45076e-171	4.84589e-171
PRSS35	1.12449	2.71433	1.58984	8.98697e-106	1.83915e-105
MGST3	6.43166	3.55136	-2.8803	1.94379e-233	3.98701e-232
WASH3P	4.35308	2.24626	-2.10682	6.16085e-230	7.45656e-229
MRPS18C	3.86709	2.02255	-1.84454	1.82629e-233	3.85005e-232
NPIPB2	2.59634	0.802669	-1.79367	2.76987e-205	1.42779e-204
NOG	1.08864	3.21971	2.13107	5.13242e-168	1.65833e-167
AMY2B	4.53633	1.25402	-3.28231	3.72774e-233	6.89841e-232
TAF10	5.6975	3.43931	-2.2582	7.50034e-225	6.67182e-224
AC091053.1	2.41753	0	-2.41753	2.99732e-236	1.16754e-234
CHST11	2.22907	4.35384	2.12477	3.55908e-235	1.11819e-233
P2RX5	2.72867	0.508084	-2.22058	4.51078e-213	2.7591e-212
NPIPB12	5.09921	0.0520091	-5.0472	7.80422e-236	2.77279e-234
ATP6V1G2-DDX39B	3.29458	0.0804154	-3.21416	3.06236e-233	5.76681e-232
BCAS1	6.2661	4.1483	-2.11779	5.12258e-103	1.03195e-102
AL035413.1	1.02827	2.66992	1.64165	6.42456e-214	3.99689e-213
PCNX2	3.61307	1.8858	-1.72727	1.11941e-212	6.78771e-212
PRPS1	3.82416	5.52427	1.70011	2.7065e-230	3.38843e-229
ANXA9	0.754514	3.09253	2.33802	5.27297e-238	3.59253e-236
NAPA	6.31765	4.12968	-2.18797	4.2161e-233	7.69258e-232
CFLAR	3.68837	2.02895	-1.65943	5.88087e-224	5.01307e-223
CCNK	2.93673	1.25328	-1.68345	1.72594e-233	3.85005e-232
NTAN1	4.04567	1.99738	-2.04829	2.74512e-232	4.34609e-231
ANKRD19P	3.1777	1.07767	-2.10004	1.23867e-184	4.77287e-184
AP006222.1	1.77383	0.143751	-1.63008	1.9393e-234	5.41902e-233
TOP1	3.43701	5.19824	1.76123	5.57763e-234	1.44123e-232
GPM6B	6.8385	8.82052	1.98201	2.99449e-214	1.87837e-213
AP001267.1	3.45249	0.0156337	-3.43685	6.50204e-236	2.3468e-234
EEF1G	7.83699	0.285163	-7.55182	1.50371e-233	3.60394e-232
GTF3C4	1.55802	3.20882	1.65079	9.55161e-232	1.39673e-230
ANKHD1	3.94694	0.562724	-3.38422	1.80071e-233	3.85005e-232
LRRC58	2.03902	3.96461	1.92559	5.94959e-237	2.768e-235
EFEMP2	4.21339	2.57854	-1.63486	8.47029e-135	2.0853e-134
TP53	1.73551	4.26532	2.52982	1.63289e-225	1.49717e-224
CHAD	2.46282	0.639164	-1.82366	2.51143e-180	9.19964e-180
LINC00674	1.05334	2.94124	1.8879	1.36518e-229	1.61155e-228
MT-TP	0.000124845	9.98771	9.98758	0	0
GALNT13	2.50144	4.68547	2.18403	1.31278e-148	3.5857e-148
CHMP4A	5.28368	1.53349	-3.75019	1.80055e-233	3.85005e-232
SIGIRR	4.2085	1.90737	-2.30113	7.96195e-192	3.36046e-191
SOX9	3.6969	6.15996	2.46306	1.61153e-205	8.36388e-205
SOX21	2.05458	4.39002	2.33545	1.51834e-208	8.35961e-208
GTF2H2C	2.619	0.555821	-2.06318	1.8135e-233	3.85005e-232
FP671120.4	10.531	0.0175694	-10.5134	6.32938e-241	6.43227e-239
POU3F2	1.97927	4.15672	2.17745	4.90973e-232	7.48641e-231
AC090984.1	3.00063	0	-3.00063	1.87266e-244	2.43331e-242
C2orf92	2.82083	0.770915	-2.04992	1.07845e-232	1.83518e-231
SNORD3A	4.63868	0.0567273	-4.58195	9.23351e-234	2.31998e-232
PPP1R10	3.33688	5.06059	1.72371	1.08628e-233	2.67757e-232
BOLA2-SMG1P6	3.0672	1.18114	-1.88605	1.71779e-232	2.81263e-231
ZBTB12	1.5248	3.56941	2.04461	2.03557e-235	6.73255e-234
AC021739.5	0.264441	1.99473	1.73029	2.45107e-227	2.44985e-226
MAP7D2	3.19654	1.58829	-1.60825	2.72787e-94	5.23944e-94
HNRNPCP2	0.793027	4.204	3.41097	2.39611e-238	1.99943e-236
INO80C	3.54768	1.95358	-1.5941	7.87832e-231	1.02956e-229
HEY1	3.69702	6.35474	2.65772	2.90633e-227	2.89376e-226
HERC2P9	4.80741	1.657	-3.15041	1.33255e-232	2.22185e-231
CXXC4	1.38561	3.26437	1.87876	7.05565e-209	3.92266e-208
TMEM191A	2.91407	0.28441	-2.62966	2.50994e-230	3.1532e-229
HIF1A	3.89702	5.95749	2.06047	4.23323e-225	3.80468e-224
NDUFB1	7.34382	4.36368	-2.98014	1.95907e-233	3.99736e-232
GJA1	5.67112	7.51956	1.84843	2.28577e-95	4.41922e-95
H3F3AP4	4.9941	2.79423	-2.19987	4.11816e-217	2.77766e-216
ATOX1	5.74335	3.34999	-2.39336	1.12751e-229	1.33707e-228
AC104117.2	1.7123	0	-1.7123	1.87268e-244	2.43331e-242
CYP4F29P	1.89539	0.267061	-1.62833	8.36371e-172	2.80244e-171
RPS29	9.17406	4.49916	-4.67491	1.68249e-233	3.85005e-232
AL121760.1	0.206965	2.12162	1.91466	1.39245e-240	1.39176e-238
MMP16	1.04813	3.36025	2.31212	3.85546e-224	3.3192e-223
BRK1	5.8784	7.48639	1.60799	2.36737e-238	1.99928e-236
RBP1	4.97471	2.29144	-2.68328	2.71392e-156	7.87132e-156
TMEM130	5.27596	3.21982	-2.05613	6.14704e-92	1.16541e-91
GATB	4.09278	2.25512	-1.83766	3.56483e-230	4.39647e-229
CCNI2	5.1608	1.02843	-4.13237	1.80696e-233	3.85005e-232
CERCAM	5.88169	4.03713	-1.84455	1.0021e-104	2.03928e-104
HADHA	4.84078	6.59025	1.74947	1.34131e-235	4.56925e-234
H3F3A	6.8001	3.24535	-3.55475	1.79843e-233	3.85005e-232
BTG2	3.95763	6.36412	2.40649	7.37538e-215	4.70426e-214
SASH3	0.993756	2.76805	1.7743	1.30047e-176	4.582e-176
FAM219B	4.69042	2.65634	-2.03408	2.04478e-233	4.11923e-232
EEF1A1P13	0.531099	2.1449	1.6138	3.82259e-236	1.46086e-234
NADSYN1	4.169	2.04275	-2.12625	4.32356e-233	7.86499e-232
CCNDBP1	4.42387	2.52127	-1.9026	2.00906e-233	4.0698e-232
PPP1R1B	6.81772	3.88596	-2.93176	1.68478e-160	5.06074e-160
CHST14	1.47458	3.13915	1.66457	5.81705e-229	6.56847e-228
OLIG2	3.62491	7.19875	3.57384	1.46038e-213	9.00837e-213
MYO15B	4.88667	1.83424	-3.05243	8.65478e-232	1.27584e-230
SAP25	2.06233	0.226248	-1.83609	1.90925e-215	1.23292e-214
RPL39	8.37203	5.02643	-3.3456	2.85324e-233	5.43491e-232
RASD1	4.5697	6.47652	1.90682	5.82742e-149	1.59384e-148
SH3BGRL	5.02496	6.76099	1.73603	4.77221e-221	3.6262e-220
NSUN5P2	3.87408	0.853225	-3.02086	2.09616e-233	4.19956e-232
CALU	3.25285	4.85759	1.60474	1.12155e-224	9.87994e-224
RGS3	3.32777	1.44404	-1.88373	3.31133e-211	1.93873e-210
KCNJ10	4.37291	6.57387	2.20096	2.0174e-199	9.45597e-199
AC008738.7	5.0989	0	-5.0989	1.87253e-244	2.43331e-242
[truncated: 94 more rows]
